# Supplementary material for: Salivary microRNA and Metabolic Profiles in a Mouse Model of Subchronic and Mild Social Defeat Stress
Source: MDPI journal article supplement (doi:10.3390/ijms232214479), 2022-11-21
Supplement: s1 [file s1]

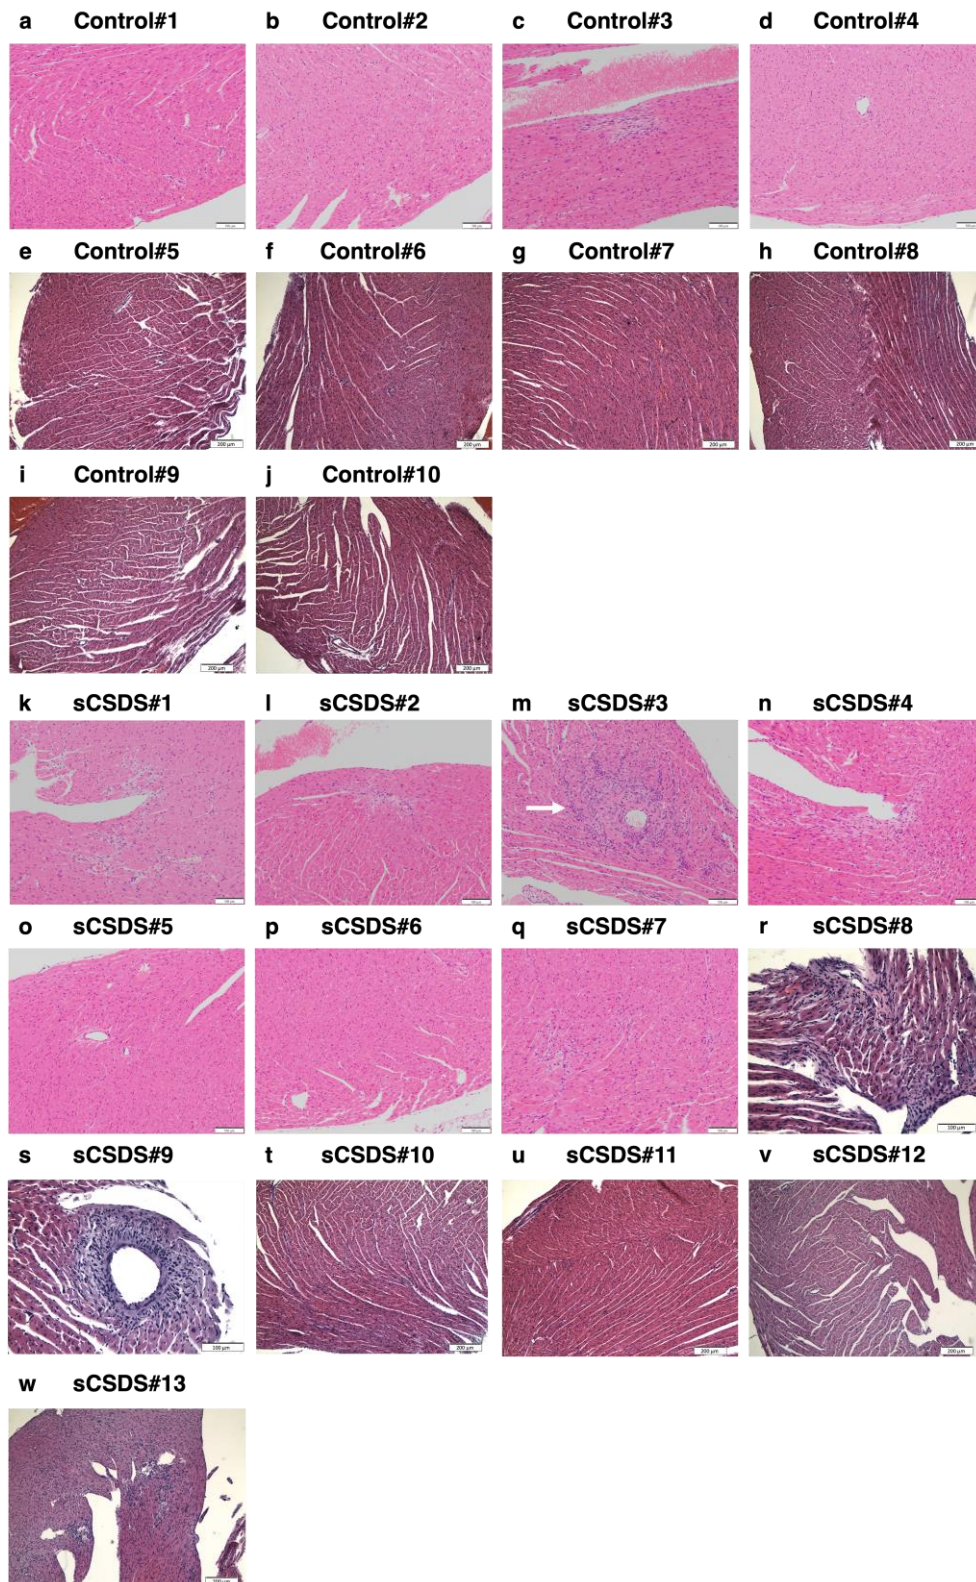

**Supplementary Figure S1.** a–w: The histological sections of the hearts from the control#1 (a), control#2 (b), control#3 (c), control#4 (d), control#5 (e), control#6 (f), control#7 (g), control#8 (h), control#9 (i), and

control#10 (**j**) mice and sCSDS#1 (**k**), sCSDS#2 (**l**), sCSDS#3 (**m**), sCSDS#4 (**n**), sCSDS#5 (**o**), sCSDS#6 (**p**), sCSDS#7 (**q**), sCSDS#8 (**r**), sCSDS#9 (**s**), sCSDS#10 (**t**), sCSDS#11 (**u**), sCSDS#12 (**v**), and sCSDS#13 (**w**) mice. White arrow in (M and S) shows the area of inflammatory cell accumulation.
