# Supplementary material for: Salivary microRNA and Metabolic Profiles in a Mouse Model of Subchronic and Mild Social Defeat Stress
Source: Int J Mol Sci. 2022 Nov 21;23(22):14479. doi: 10.3390/ijms232214479 (PMC9692636; doi:10.3390/ijms232214479)
Supplement: Supplementary file 1 [file ijms-23-14479-s001.zip › Supplementary Table S1-S5.xlsx]

## Sheet: Supplementary Table S1.
Supplementary Table S1. The list of salivary miRNAs upregulated by sCSDS (Fold change > 2).
					Read counts (raw)										Normalized read counts
Name	Accession_ID	q value	p value	Fold change	sCSDS#1	sCSDS#2	sCSDS#3	sCSDS#4	sCSDS#5	Control#1	Control#2	Control#3	Control#4	Control#5	sCSDS#1	sCSDS#2	sCSDS#3	sCSDS#4	sCSDS#5	Control#1	Control#2	Control#3	Control#4	Control#5
mmu-miR-6985-3p	MIMAT0027873	0.060856	5.36498e-05	7.66451	3	3	21	23	3	0	0	0	0	0	3.4096	3.35326	2.38585	2.22706	3.3152	0	0	0	0	0
mmu-miR-7092-5p	MIMAT0028090	0.060856	9.24664e-05	9.13243	6	1	45	29	4	0	0	0	0	0	4.4096	1.7683	3.48538	2.56148	3.73024	0	0	0	0	0
mmu-miR-208b-3p	MIMAT0004939	0.060856	9.34329e-05	10.765	3	6	66	12	5	0	0	0	0	0	3.4096	4.35326	4.03792	1.28847	4.05216	0	0	0	0	0
mmu-miR-378a-5p	MIMAT0000742	0.0685032	0.000146995	12.2069	8	8	29	12	6	0	0	0	0	0	4.82463	4.7683	2.85151	1.28847	4.3152	0	0	0	0	0
mmu-miR-6944-3p	MIMAT0027789	0.0685032	0.00017529	6.19533	2	2	25	15	3	0	0	0	0	0	2.82463	2.7683	2.63738	1.61039	3.3152	0	0	0	0	0
mmu_piR_000159/gb/DQ539904/Mus_musculus:2:73668844:73668871:Plus	GenBank:DQ539904	0.0707278	0.000217179	5.94064	2	3	19	16	2	0	0	0	0	0	2.82463	3.35326	2.24146	1.7035	2.73024	0	0	0	0	0
mmu-miR-3064-3p	MIMAT0014835	0.0982773	0.000402364	7.33098	5	3	8	29	3	0	0	0	0	0	4.14656	3.35326	0.993529	2.56148	3.3152	0	0	0	0	0
mmu-miR-7675-3p	MIMAT0029859	0.108106	0.00049793	4.78128	1	2	14	22	2	0	0	0	0	0	1.82463	2.7683	1.80088	2.16293	2.73024	0	0	0	0	0
mmu-miR-5709-5p	MIMAT0022504	0.12275	0.000710797	4.93281	2	2	9	20	2	0	0	0	0	0	2.82463	2.7683	1.16345	2.02543	2.73024	0	0	0	0	0
mmu-miR-6988-3p	MIMAT0027879	0.12275	0.000722518	5.2949	3	2	9	19	2	0	0	0	0	0	3.4096	2.7683	1.16345	1.95143	2.73024	0	0	0	0	0
mmu-miR-881-3p	MIMAT0004846	0.12275	0.000825735	6.54509	1	2	21	141	1	0	0	0	0	0	1.82463	2.7683	2.38585	4.84305	1.73024	0	0	0	0	0
mmu-miR-450a-1-3p	MIMAT0017182	0.12275	0.000960612	4.47012	1	2	10	22	2	0	0	0	0	0	1.82463	2.7683	1.31546	2.16293	2.73024	0	0	0	0	0
mmu-miR-6896-3p	MIMAT0027693	0.12275	0.000991925	6.77851	4	3	21	7	4	0	0	0	0	0	3.82463	3.35326	2.38585	0.510857	3.73024	0	0	0	0	0
mmu-miR-6926-3p	MIMAT0027753	0.12275	0.00105922	5.07753	2	4	13	16	1	0	0	0	0	0	2.82463	3.7683	1.69397	1.7035	1.73024	0	0	0	0	0
mmu-miR-5615-5p	MIMAT0022355	0.12275	0.0011178	4.44754	1	1	13	22	3	0	0	0	0	0	1.82463	1.7683	1.69397	2.16293	3.3152	0	0	0	0	0
mmu-miR-6897-5p	MIMAT0027694	0.12275	0.00114466	5.06157	3	3	13	14	1	0	0	0	0	0	3.4096	3.35326	1.69397	1.51086	1.73024	0	0	0	0	0
mmu-miR-106a-5p	MIMAT0000385	0.12275	0.00122751	4.29426	1	2	10	18	2	0	0	0	0	0	1.82463	2.7683	1.31546	1.87343	2.73024	0	0	0	0	0
mmu-miR-7235-3p	MIMAT0028439	0.12275	0.00130251	5.97158	1	8	26	18	1	0	0	0	0	0	1.82463	4.7683	2.69397	1.87343	1.73024	0	0	0	0	0
mmu-miR-466c-5p	MIMAT0004877	0.12275	0.00131921	5.57109	3	2	21	7	3	0	0	0	0	0	3.4096	2.7683	2.38585	0.510857	3.3152	0	0	0	0	0
mmu-miR-130a-5p	MIMAT0016983	0.15064	0.00169605	4.19429	1	2	16	10	2	0	0	0	0	0	1.82463	2.7683	1.99353	1.02543	2.73024	0	0	0	0	0
mmu-miR-539-3p	MIMAT0017208	0.164974	0.00194186	4.23919	1	1	9	25	3	0	0	0	0	0	1.82463	1.7683	1.16345	2.34736	3.3152	0	0	0	0	0
mmu-miR-5123	MIMAT0020633	0.172275	0.00215929	3.44718	1	1	15	16	1	0	0	0	0	0	1.82463	1.7683	1.90042	1.7035	1.73024	0	0	0	0	0
mmu-miR-16-1-3p	MIMAT0004625	0.172275	0.00220413	4.23542	1	2	21	8	2	0	0	0	0	0	1.82463	2.7683	2.38585	0.703503	2.73024	0	0	0	0	0
mmu-miR-301a-5p	MIMAT0017008	0.173113	0.00237981	6.43963	6	2	13	7	5	0	0	0	0	0	4.4096	2.7683	1.69397	0.510857	4.05216	0	0	0	0	0
mmu-miR-802-5p	MIMAT0004188	0.173113	0.00239204	5.22495	6	1	8	20	2	0	0	0	0	0	4.4096	1.7683	0.993529	2.02543	2.73024	0	0	0	0	0
mmu-miR-878-3p	MIMAT0004933	0.192946	0.00288195	3.3753	1	1	18	12	1	0	0	0	0	0	1.82463	1.7683	2.16345	1.28847	1.73024	0	0	0	0	0
mmu-miR-295-5p	MIMAT0004575	0.192946	0.00296232	4.20472	3	1	9	12	2	0	0	0	0	0	3.4096	1.7683	1.16345	1.28847	2.73024	0	0	0	0	0
mmu-miR-335-5p	MIMAT0000766	0.19444	0.00308477	7.22696	9	3	12	6	5	0	0	0	0	0	4.99456	3.35326	1.57849	0.288465	4.05216	0	0	0	0	0
mmu-miR-3618-5p	MIMAT0035716	0.218888	0.00365931	4.16235	2	2	11	7	2	0	0	0	0	0	2.82463	2.7683	1.45296	0.510857	2.73024	0	0	0	0	0
mmu-miR-124-5p	MIMAT0004527	0.220093	0.00382966	3.49197	1	2	8	16	1	0	0	0	0	0	1.82463	2.7683	0.993529	1.7035	1.73024	0	0	0	0	0
mmu-miR-132-5p	MIMAT0016984	0.233448	0.00418151	3.48099	1	2	14	9	1	0	0	0	0	0	1.82463	2.7683	1.80088	0.873428	1.73024	0	0	0	0	0
mmu-miR-6384	MIMAT0025130	0.240868	0.00443768	6.19781	5	4	11	68	0	0	0	0	0	0	4.14656	3.7683	1.45296	3.79097	0	0	0	0	0	0
mmu-miR-7227-5p	MIMAT0028422	0.253772	0.00484224	5.34934	0	3	17	25	6	0	0	0	0	0	0	3.35326	2.08099	2.34736	4.3152	0	0	0	0	0
mmu-miR-7243-3p	MIMAT0029911	0.253772	0.00493517	6.18719	5	7	13	3	2	0	0	0	0	0	4.14656	4.57566	1.69397	0	2.73024	0	0	0	0	0
mmu_piR_000578/gb/DQ540853/Mus_musculus:17:39456112:39456137:Plus	GenBank:DQ540853	0.269838	0.00538571	7.47568	8	3	75	13	7	0	0	0	0	27	4.82463	3.35326	4.22235	1.40394	4.53759	0	0	0	0	3.83075
mmu-miR-7042-3p	MIMAT0027989	0.283664	0.00580683	4.66731	6	1	13	7	2	0	0	0	0	0	4.4096	1.7683	1.69397	0.510857	2.73024	0	0	0	0	0
mmu-miR-7020-5p	MIMAT0027944	0.305523	0.00672337	3.98985	14	18	105	271	24	38	44	29	2	26	5.63199	5.93823	4.70777	5.78565	6.3152	4.24629	4.88207	3.44051	2.05199	3.7763
mmu-miR-466n-3p	MIMAT0014894	0.315533	0.00720108	7.70757	5	6	7	0	13	0	0	0	0	0	4.14656	4.35326	0.800884	0	5.43067	0	0	0	0	0
mmu_piR_008475/gb/DQ567581/Mus_musculus:12:70077986:70078015:Plus	GenBank:DQ567581	0.315533	0.00726663	4.07405	3	1	18	34	0	0	0	0	0	0	3.4096	1.7683	2.16345	2.79097	0	0	0	0	0	0
mmu-miR-6420	MIMAT0025176	0.330182	0.0081374	7.88607	2	4	317	25	5	0	0	0	0	40	2.82463	3.7683	6.30187	2.34736	4.05216	0	0	0	0	4.39779
mmu-miR-216c-5p	MIMAT0029888	0.330182	0.00824973	4.16638	3	1	14	1	3	0	0	0	0	0	3.4096	1.7683	1.80088	0	3.3152	0	0	0	0	0
mmu-miR-143-5p	MIMAT0017006	0.330182	0.00846056	4.89257	0	2	18	17	8	0	0	0	0	0	0	2.7683	2.16345	1.79097	4.73024	0	0	0	0	0
mmu-miR-7664-5p	MIMAT0029834	0.330182	0.00864063	4.1961	4	2	19	14	0	0	0	0	0	0	3.82463	2.7683	2.24146	1.51086	0	0	0	0	0	0
mmu-miR-878-5p	MIMAT0004932	0.330182	0.00882684	3.87966	2	5	38	84	4	7	3	18	3	0	2.82463	4.09023	3.24146	4.09582	3.73024	1.80572	1.0076	2.75245	2.63695	0
mmu-miR-429-5p	MIMAT0017178	0.330182	0.00911609	4.00091	3	1	13	43	0	0	0	0	0	0	3.4096	1.7683	1.69397	3.12977	0	0	0	0	0	0
mmu-miR-7030-3p	MIMAT0027965	0.336629	0.0106949	2.83943	1	1	13	7	1	0	0	0	0	0	1.82463	1.7683	1.69397	0.510857	1.73024	0	0	0	0	0
mmu-miR-7678-3p	MIMAT0029871	0.336629	0.0106984	3.7999	3	2	18	12	0	0	0	0	0	0	3.4096	2.7683	2.16345	1.28847	0	0	0	0	0	0
mmu-miR-741-3p	MIMAT0004236	0.336629	0.0107761	4.49878	3	1	23	121	3	5	2	22	0	0	3.4096	1.7683	2.51709	4.62237	3.3152	1.3203	0.422635	3.04196	0	0
mmu-miR-6957-3p	MIMAT0027815	0.336629	0.011456	3.38279	1	0	12	31	2	0	0	0	0	0	1.82463	0	1.57849	2.6577	2.73024	0	0	0	0	0
mmu-miR-5129-3p	MIMAT0022987	0.336629	0.0115974	3.34191	0	2	13	28	1	0	0	0	0	0	0	2.7683	1.69397	2.51086	1.73024	0	0	0	0	0
mmu-miR-883b-3p	MIMAT0004851	0.336629	0.0116264	3.28983	2	1	19	5	1	0	0	0	0	0	2.82463	1.7683	2.24146	0.0254307	1.73024	0	0	0	0	0
mmu-miR-6935-5p	MIMAT0027770	0.336629	0.0120976	3.58252	2	1	20	23	2	0	0	0	0	12	2.82463	1.7683	2.31546	2.22706	2.73024	0	0	0	0	2.66083
mmu-miR-6341	MIMAT0025084	0.336629	0.0123595	5.15335	14	2	8	8	1	0	0	0	0	0	5.63199	2.7683	0.993529	0.703503	1.73024	0	0	0	0	0
mmu-miR-18a-5p	MIMAT0000528	0.336629	0.0128101	5.10893	3	3	75	3	3	0	0	0	0	11	3.4096	3.35326	4.22235	0	3.3152	0	0	0	0	2.5353
mmu-miR-190a-5p	MIMAT0000220	0.336629	0.0128592	6.61908	6	8	14	1	10	0	0	0	0	10	4.4096	4.7683	1.80088	0	5.05216	0	0	0	0	2.39779
mmu-miR-7241-5p	MIMAT0028450	0.336629	0.0131385	3.55382	0	2	11	15	3	0	0	0	0	0	0	2.7683	1.45296	1.61039	3.3152	0	0	0	0	0
mmu-miR-138-2-3p	MIMAT0016987	0.336629	0.0132452	3.159	22	11	83	310	15	34	23	74	4	19	6.28407	5.22773	4.36857	5.97963	5.63713	4.08583	3.9462	4.79198	3.05199	3.32379
mmu-miR-7093-5p	MIMAT0028092	0.336629	0.0134376	4.39017	3	3	71	187	1	13	2	11	2	0	3.4096	3.35326	4.14328	5.2504	1.73024	2.69881	0.422635	2.04196	2.05199	0
mmu-miR-291a-5p	MIMAT0000367	0.36091	0.014961	3.01567	1	1	24	17	0	0	0	0	0	0	1.82463	1.7683	2.57849	1.79097	0	0	0	0	0	0
mmu-miR-669g	MIMAT0005832	0.362114	0.0151962	3.24045	0	2	13	12	2	0	0	0	0	0	0	2.7683	1.69397	1.28847	2.73024	0	0	0	0	0
mmu-miR-34a-3p	MIMAT0017022	0.369462	0.0166304	3.77053	1	0	64	10	2	0	0	0	0	0	1.82463	0	3.99353	1.02543	2.73024	0	0	0	0	0
mmu-miR-224-3p	MIMAT0017062	0.369462	0.0166512	3.24893	2	0	8	19	2	0	0	0	0	0	2.82463	0	0.993529	1.95143	2.73024	0	0	0	0	0
mmu-miR-1b-3p	MIMAT0017326	0.387314	0.0184707	3.14809	0	2	27	10	1	0	0	0	0	0	0	2.7683	2.74842	1.02543	1.73024	0	0	0	0	0
mmu-miR-344d-2-5p	MIMAT0014961	0.387314	0.0188455	3.37846	3	2	12	10	0	0	0	0	0	0	3.4096	2.7683	1.57849	1.02543	0	0	0	0	0	0
mmu-miR-7224-3p	MIMAT0028417	0.393861	0.0197931	2.78765	0	1	21	14	1	0	0	0	0	0	0	1.7683	2.38585	1.51086	1.73024	0	0	0	0	0
mmu-miR-212-5p	MIMAT0017053	0.393861	0.0203623	4.30788	12	5	70	12	5	17	6	13	1	0	5.4096	4.09023	4.12281	1.28847	4.05216	3.08583	2.0076	2.28296	1.05199	0
mmu-miR-6954-5p	MIMAT0027808	0.393861	0.0203696	3.11803	3	0	11	15	1	0	0	0	0	0	3.4096	0	1.45296	1.61039	1.73024	0	0	0	0	0
mmu-miR-5615-3p	MIMAT0022356	0.393861	0.0203898	3.28884	0	1	14	12	4	0	0	0	0	0	0	1.7683	1.80088	1.28847	3.73024	0	0	0	0	0
mmu-miR-3967	MIMAT0019351	0.394614	0.021003	3.57183	37	13	264	226	26	123	29	65	2	41	7.03409	5.46874	6.03792	5.52368	6.43067	5.94088	4.28062	4.60489	2.05199	4.43342
mmu-miR-7054-3p	MIMAT0028013	0.395424	0.0212485	3.43052	3	0	19	7	2	0	0	0	0	0	3.4096	0	2.24146	0.510857	2.73024	0	0	0	0	0
mmu-miR-1968-3p	MIMAT0017350	0.402935	0.0226831	3.03006	1	0	13	11	3	0	0	0	0	0	1.82463	0	1.69397	1.16293	3.3152	0	0	0	0	0
mmu-miR-3965	MIMAT0019347	0.409397	0.0236636	2.90865	9	5	34	50	5	9	14	18	1	12	4.99456	4.09023	3.08099	3.34736	4.05216	2.16829	3.22999	2.75245	1.05199	2.66083
mmu-miR-543-5p	MIMAT0017207	0.409397	0.0236755	2.60623	0	1	15	14	1	0	0	0	0	0	0	1.7683	1.90042	1.51086	1.73024	0	0	0	0	0
mmu-miR-7661-5p	MIMAT0029828	0.415095	0.0242174	3.80968	0	3	31	50	0	0	0	0	0	0	0	3.35326	2.94772	3.34736	0	0	0	0	0	0
mmu-miR-145b	MIMAT0025105	0.42254	0.0269464	3.42087	3	3	34	205	3	7	7	32	2	0	3.4096	3.35326	3.08099	5.38298	3.3152	1.80572	2.22999	3.58252	2.05199	0
mmu-miR-98-3p	MIMAT0017023	0.42254	0.0269994	5.30229	82	12	45	86	45	13	14	8	26	16	8.18219	5.35326	3.48538	4.12977	7.22209	2.69881	3.22999	1.58252	5.75242	3.07586
mmu-miR-493-3p	MIMAT0004888	0.424203	0.027354	2.57574	0	1	9	22	1	0	0	0	0	0	0	1.7683	1.16345	2.16293	1.73024	0	0	0	0	0
mmu-miR-144-5p	MIMAT0016988	0.424763	0.0276074	3.10495	0	2	36	7	1	0	0	0	0	0	0	2.7683	3.16345	0.510857	1.73024	0	0	0	0	0
mmu_piR_038323/gb/piRNA-T34/Mus_musculus:9:3258895:3258925:Minus	GenBank:piRNA-T34	0.425347	0.0282276	3.09158	1	3	22	7	0	0	0	0	0	0	1.82463	3.35326	2.45296	0.510857	0	0	0	0	0	0
mmu-miR-8120	MIMAT0031426	0.425347	0.0283949	3.00513	10	10	69	399	31	23	28	89	6	15	5.14656	5.09023	4.10205	6.34375	6.68443	3.52193	4.22999	5.05826	3.63695	2.98276
mmu-miR-7243-5p	MIMAT0029910	0.425347	0.0285161	2.49838	0	1	10	17	1	0	0	0	0	0	0	1.7683	1.31546	1.79097	1.73024	0	0	0	0	0
mmu-miR-7684-5p	MIMAT0029890	0.429181	0.0289928	2.81481	2	3	37	26	2	10	3	17	1	0	2.82463	3.35326	3.20298	2.40394	2.73024	2.3203	1.0076	2.66999	1.05199	0
mmu-miR-7655-3p	MIMAT0029817	0.429381	0.0292672	2.89038	1	3	11	10	0	0	0	0	0	0	1.82463	3.35326	1.45296	1.02543	0	0	0	0	0	0
mmu-miR-6910-3p	MIMAT0027721	0.433252	0.029933	2.90755	2	3	97	47	6	5	18	13	1	10	2.82463	3.35326	4.59344	3.25809	4.3152	1.3203	3.59256	2.28296	1.05199	2.39779
mmu-miR-6386	MIMAT0025133	0.44927	0.0319593	3.4616	0	2	37	34	2	0	0	0	0	11	0	2.7683	3.20298	2.79097	2.73024	0	0	0	0	2.5353
mmu-miR-6907-3p	MIMAT0027715	0.449784	0.0324623	3.17277	5	0	9	12	1	0	0	0	0	0	4.14656	0	1.16345	1.28847	1.73024	0	0	0	0	0
mmu-miR-665-3p	MIMAT0003733	0.457168	0.0337509	3.53265	2	6	5	15	0	0	0	0	0	0	2.82463	4.35326	0.315457	1.61039	0	0	0	0	0	0
mmu-miR-1a-1-5p	MIMAT0016979	0.469644	0.0359595	3.13553	1	2	9	35	2	0	0	0	0	16	1.82463	2.7683	1.16345	2.83279	2.73024	0	0	0	0	3.07586
mmu-miR-6921-3p	MIMAT0027743	0.469644	0.0363231	2.97738	0	0	24	29	2	0	0	0	0	0	0	0	2.57849	2.56148	2.73024	0	0	0	0	0
mmu-miR-147-5p	MIMAT0017269	0.469644	0.0367883	3.50182	3	3	53	49	8	22	7	3	6	0	3.4096	3.35326	3.72145	3.31821	4.73024	3.4578	2.22999	0.167487	3.63695	0
mmu-miR-6899-3p	MIMAT0027699	0.469644	0.0370452	2.74057	0	1	10	9	3	0	0	0	0	0	0	1.7683	1.31546	0.873428	3.3152	0	0	0	0	0
mmu-miR-7069-3p	MIMAT0028045	0.469644	0.0374048	3.24853	4	0	24	21	0	0	0	0	0	0	3.82463	0	2.57849	2.09582	0	0	0	0	0	0
mmu_piR_000414/gb/DQ540526/Mus_musculus:17:39454472:39454499:Plus	GenBank:DQ540526	0.472074	0.0380065	3.48162	2	4	36	6	1	0	0	0	0	13	2.82463	3.7683	3.16345	0.288465	1.73024	0	0	0	0	2.7763
mmu-miR-20b-3p	MIMAT0004788	0.472074	0.0381718	2.5271	0	1	9	10	2	0	0	0	0	0	0	1.7683	1.16345	1.02543	2.73024	0	0	0	0	0
mmu-miR-3061-5p	MIMAT0014828	0.476109	0.0392291	3.20359	5	1	19	79	2	5	9	16	0	0	4.14656	1.7683	2.24146	4.00728	2.73024	1.3203	2.59256	2.58252	0	0
mmu-miR-188-5p	MIMAT0000217	0.481208	0.0403827	3.4543	9	7	24	26	2	4	12	26	1	0	4.99456	4.57566	2.57849	2.40394	2.73024	0.998367	3.0076	3.28296	1.05199	0
mmu-miR-6965-3p	MIMAT0027831	0.481208	0.0405474	4.04461	3	5	23	773	7	17	11	18	4	0	3.4096	4.09023	2.51709	7.29783	4.53759	3.08583	2.88207	2.75245	3.05199	0
mmu-miR-325-5p	MIMAT0000558	0.481208	0.0408734	2.97223	0	0	15	46	2	0	0	0	0	0	0	0	1.90042	3.22706	2.73024	0	0	0	0	0
mmu-miR-6958-3p	MIMAT0027817	0.481208	0.0415502	2.87264	4	1	8	10	0	0	0	0	0	0	3.82463	1.7683	0.993529	1.02543	0	0	0	0	0	0
mmu-miR-211-3p	MIMAT0017059	0.481208	0.0416042	2.85069	0	0	28	20	2	0	0	0	0	0	0	0	2.80088	2.02543	2.73024	0	0	0	0	0
mmu-miR-126a-5p	MIMAT0000137	0.481208	0.0416193	3.32017	3	4	11	5	0	0	0	0	0	0	3.4096	3.7683	1.45296	0.0254307	0	0	0	0	0	0
mmu-miR-3087-3p	MIMAT0014896	0.487034	0.0424263	3.1586	4	2	2	16	0	0	0	0	0	0	3.82463	2.7683	0	1.7035	0	0	0	0	0	0
mmu-miR-1224-5p	MIMAT0005460	0.487034	0.0426884	2.64031	41	47	191	312	77	92	102	147	20	37	7.18219	7.32289	5.57096	5.9889	7.99702	5.52193	6.09506	5.7822	5.37391	4.28532
mmu-miR-9-3p	MIMAT0000143	0.488292	0.0434814	2.93694	3	1	12	42	3	16	3	7	0	0	3.4096	1.7683	1.57849	3.09582	3.3152	2.99837	1.0076	1.38988	0	0
mmu-miR-1961	MIMAT0009434	0.488706	0.0440461	4.46549	4	1	90	2	6	0	0	0	0	23	3.82463	1.7683	4.48538	0	4.3152	0	0	0	0	3.59943
mmu-miR-434-5p	MIMAT0001421	0.488706	0.0444948	2.27185	1	1	9	11	0	0	0	0	0	0	1.82463	1.7683	1.16345	1.16293	0	0	0	0	0	0
mmu-miR-6964-3p	MIMAT0027829	0.489281	0.0451425	3.49085	3	0	23	49	4	15	1	2	1	0	3.4096	0	2.51709	3.31821	3.73024	2.90526	0	0	1.05199	0
mmu-miR-6900-3p	MIMAT0027701	0.489281	0.0451983	3.62331	2	0	12	145	0	0	0	0	0	0	2.82463	0	1.57849	4.88341	0	0	0	0	0	0
mmu-miR-6414	MIMAT0025168	0.489281	0.0455728	2.39734	1	0	19	7	1	0	0	0	0	0	1.82463	0	2.24146	0.510857	1.73024	0	0	0	0	0
mmu-miR-470-3p	MIMAT0004760	0.490363	0.0460356	2.27185	1	1	11	9	0	0	0	0	0	0	1.82463	1.7683	1.45296	0.873428	0	0	0	0	0	0
mmu-miR-5101	MIMAT0020608	0.505481	0.0484142	2.87516	2	0	11	5	3	0	0	0	0	0	2.82463	0	1.45296	0.0254307	3.3152	0	0	0	0	0
mmu-miR-7680-3p	MIMAT0029875	0.505481	0.0486338	2.30648	0	1	6	19	1	0	0	0	0	0	0	1.7683	0.578491	1.95143	1.73024	0	0	0	0	0
mmu-miR-380-3p	MIMAT0000745	0.513038	0.0499273	2.76177	0	1	19	49	0	0	0	0	0	0	0	1.7683	2.24146	3.31821	0	0	0	0	0	0
mmu-miR-6926-5p	MIMAT0027752	0.514479	0.050816	2.33915	9	6	172	142	3	29	13	37	3	20	4.99456	4.35326	5.41979	4.85325	3.3152	3.85635	3.12307	3.79198	2.63695	3.39779
mmu-miR-7667-3p	MIMAT0029841	0.515632	0.0528394	3.11719	0	0	17	103	1	0	0	0	0	0	0	0	2.08099	4.39	1.73024	0	0	0	0	0
mmu-miR-6336	MIMAT0025079	0.515632	0.0530433	2.21895	1	1	11	8	0	0	0	0	0	0	1.82463	1.7683	1.45296	0.703503	0	0	0	0	0	0
mmu-miR-7081-5p	MIMAT0028068	0.515632	0.0545595	2.94879	8	3	21	102	5	10	15	30	2	0	4.82463	3.35326	2.38585	4.37593	4.05216	2.3203	3.32952	3.48942	2.05199	0
mmu-miR-7223-3p	MIMAT0028415	0.515632	0.0562026	2.90548	0	1	3	18	5	0	0	0	0	0	0	1.7683	0	1.87343	4.05216	0	0	0	0	0
mmu_piR_000159/gb/DQ539904/Mus_musculus:6:87962871:87962898:Minus	GenBank:DQ539904	0.515632	0.0562224	2.59827	2	1	10	20	1	0	0	0	0	13	2.82463	1.7683	1.31546	2.02543	1.73024	0	0	0	0	2.7763
mmu-miR-7669-5p	MIMAT0029844	0.515632	0.0569129	3.09667	0	5	33	10	0	0	0	0	0	0	0	4.09023	3.03792	1.02543	0	0	0	0	0	0
mmu-miR-6994-5p	MIMAT0027890	0.515632	0.0570864	2.20092	9	12	126	324	25	23	36	74	12	43	4.99456	5.35326	4.97081	6.04335	6.37409	3.52193	4.59256	4.79198	4.63695	4.50213
mmu-miR-217-5p	MIMAT0000679	0.515632	0.0571016	3.51726	52	33	45	32	28	25	16	34	5	28	7.52507	6.81269	3.48538	2.7035	6.53759	3.64222	3.42263	3.66999	3.37391	3.88322
mmu-miR-7117-5p	MIMAT0028131	0.515632	0.0571216	2.40273	5	4	37	179	4	10	9	11	9	11	4.14656	3.7683	3.20298	5.18732	3.73024	2.3203	2.59256	2.04196	4.22191	2.5353
mmu_piR_022956/gb/DQ705141/Mus_musculus:5:115112809:115112837:Minus	GenBank:DQ705141	0.521215	0.0584166	2.82945	1	0	62	2	1	0	0	0	0	0	1.82463	0	3.94772	0	1.73024	0	0	0	0	0
mmu-miR-467f	MIMAT0005846	0.525503	0.0595194	2.42507	0	1	18	27	0	0	0	0	0	0	0	1.7683	2.16345	2.45839	0	0	0	0	0	0
mmu-miR-700-5p	MIMAT0017256	0.527304	0.0608313	2.76232	18	6	36	41	17	8	10	40	6	13	5.99456	4.35326	3.16345	3.06105	5.8177	1.99837	2.74456	3.90445	3.63695	2.7763
mmu-miR-696	MIMAT0003483	0.527304	0.060988	2.46776	2	0	17	15	0	0	0	0	0	0	2.82463	0	2.08099	1.61039	0	0	0	0	0	0
mmu-miR-29b-1-5p	MIMAT0004523	0.529556	0.0617376	2.36096	1	2	10	6	0	0	0	0	0	0	1.82463	2.7683	1.31546	0.288465	0	0	0	0	0	0
mmu-miR-7578	MIMAT0029578	0.530378	0.0626481	2.16048	1	1	11	7	0	0	0	0	0	0	1.82463	1.7683	1.45296	0.510857	0	0	0	0	0	0
mmu-miR-20a-3p	MIMAT0004627	0.53611	0.0636878	2.67197	2	6	21	12	3	13	4	5	2	0	2.82463	4.35326	2.38585	1.28847	3.3152	2.69881	1.42263	0.904453	2.05199	0
mmu-miR-7036a-3p	MIMAT0027977	0.53611	0.0639271	2.49926	17	33	101	89	29	21	40	57	16	29	5.9121	6.81269	4.65174	4.17924	6.58822	3.39068	4.74456	4.41542	5.05199	3.93385
mmu-miR-664-3p	MIMAT0012774	0.540821	0.0651676	2.14032	8	7	124	212	15	51	21	20	10	34	4.82463	4.57566	4.94773	5.43142	5.63713	4.67079	3.81495	2.90445	4.37391	4.16333
mmu-miR-543-3p	MIMAT0003168	0.540821	0.0653192	2.4202	0	0	19	13	2	0	0	0	0	0	0	0	2.24146	1.40394	2.73024	0	0	0	0	0
mmu-miR-7654-5p	MIMAT0029814	0.542782	0.0658339	2.094	15	12	263	234	19	60	32	134	7	43	5.73153	5.35326	6.03245	5.57387	5.97816	4.90526	4.42263	5.64861	3.85934	4.50213
mmu-miR-137-5p	MIMAT0016986	0.546747	0.0677769	2.18944	7	3	89	127	4	32	6	26	4	14	4.63199	3.35326	4.46926	4.69219	3.73024	3.99837	2.0076	3.28296	3.05199	2.88322
mmu-miR-141-5p	MIMAT0004533	0.546747	0.0679937	2.85559	49	20	53	193	22	25	31	20	30	37	7.43934	6.09023	3.72145	5.29596	6.18967	3.64222	4.37683	2.90445	5.95888	4.28532
mmu-miR-3110-3p	MIMAT0014952	0.554284	0.0692146	2.50515	3	5	28	26	5	9	10	12	4	0	3.4096	4.09023	2.80088	2.40394	4.05216	2.16829	2.74456	2.16749	3.05199	0
mmu_piR_004374/gb/DQ552696/Mus_musculus:18:85832427:85832456:Minus	GenBank:DQ552696	0.556169	0.0705181	2.93911	2	1	29	0	3	0	0	0	0	15	2.82463	1.7683	2.85151	0	3.3152	0	0	0	0	2.98276
mmu-miR-679-5p	MIMAT0003455	0.556169	0.0714958	2.30171	1	0	12	30	0	0	0	0	0	0	1.82463	0	1.57849	2.61039	0	0	0	0	0	0
mmu-miR-224-5p	MIMAT0000671	0.556169	0.0717271	2.75001	6	25	73	33	21	17	26	11	7	21	4.4096	6.41216	4.18335	2.7479	6.12255	3.08583	4.12307	2.04196	3.85934	3.46818
mmu-miR-21c	MIMAT0025148	0.564817	0.0740967	5.31076	57	9	13	7	17	30	6	2	0	12	7.65752	4.93823	1.69397	0.510857	5.8177	3.90526	2.0076	0	0	2.66083
mmu-miR-103-1-5p	MIMAT0017024	0.564817	0.07531	2.19202	1	0	17	5	1	0	0	0	0	0	1.82463	0	2.08099	0.0254307	1.73024	0	0	0	0	0
mmu-miR-547-5p	MIMAT0017210	0.564817	0.07531	2.19202	1	0	17	5	1	0	0	0	0	0	1.82463	0	2.08099	0.0254307	1.73024	0	0	0	0	0
mmu-miR-151-5p	MIMAT0004536	0.564817	0.075505	2.8967	3	6	38	26	11	26	16	6	3	0	3.4096	4.35326	3.24146	2.40394	5.18967	3.69881	3.42263	1.16749	2.63695	0
mmu-miR-743a-3p	MIMAT0004238	0.572001	0.0775743	2.60401	0	1	38	29	1	0	0	0	0	10	0	1.7683	3.24146	2.56148	1.73024	0	0	0	0	2.39779
mmu-miR-883b-5p	MIMAT0004850	0.582623	0.0820352	2.18604	0	0	11	27	1	0	0	0	0	0	0	0	1.45296	2.45839	1.73024	0	0	0	0	0
mmu-miR-7226-5p	MIMAT0028420	0.582623	0.082438	2.13571	15	12	349	454	7	70	34	35	17	47	5.73153	5.35326	6.44061	6.53005	4.53759	5.12765	4.5101	3.71181	5.13945	4.63045
mmu-miR-3101-5p	MIMAT0014921	0.582623	0.0825538	2.2838	0	2	18	10	0	0	0	0	0	0	0	2.7683	2.16345	1.02543	0	0	0	0	0	0
mmu_piR_039147/gb/piRNA_2740/Mus_musculus:6:87962869:87962889:Minus	GenBank:piRNA_2740	0.582623	0.0829562	3.00811	7	2	13	14	0	0	0	0	0	12	4.63199	2.7683	1.69397	1.51086	0	0	0	0	0	2.66083
mmu-miR-6407	MIMAT0025160	0.582623	0.0836713	2.59236	3	2	7	31	4	9	5	16	0	0	3.4096	2.7683	0.800884	2.6577	3.73024	2.16829	1.74456	2.58252	0	0
mmu-miR-92a-1-5p	MIMAT0017066	0.582623	0.0838644	2.27921	4	2	20	13	2	8	3	11	2	0	3.82463	2.7683	2.31546	1.40394	2.73024	1.99837	1.0076	2.04196	2.05199	0
mmu-miR-290b-5p	MIMAT0029900	0.582623	0.0839768	2.11805	0	1	13	19	0	0	0	0	0	0	0	1.7683	1.69397	1.95143	0	0	0	0	0	0
mmu-miR-592-3p	MIMAT0017234	0.587878	0.0871612	3.24669	1	3	43	331	5	35	2	22	3	0	1.82463	3.35326	3.41979	6.07419	4.05216	4.12765	0.422635	3.04196	2.63695	0
mmu-miR-1194	MIMAT0005852	0.587878	0.0876184	2.56904	3	1	21	6	1	0	0	0	0	13	3.4096	1.7683	2.38585	0.288465	1.73024	0	0	0	0	2.7763
mmu-miR-541-5p	MIMAT0003170	0.587878	0.0879546	3.32955	16	18	28	26	13	32	25	13	5	0	5.82463	5.93823	2.80088	2.40394	5.43067	3.99837	4.06649	2.28296	3.37391	0
mmu-miR-6373	MIMAT0025117	0.587878	0.0882974	2.34593	2	1	12	10	1	0	0	0	0	13	2.82463	1.7683	1.57849	1.02543	1.73024	0	0	0	0	2.7763
mmu-miR-546	MIMAT0003166	0.587878	0.0887412	3.17878	14	1	49	52	15	9	10	13	11	0	5.63199	1.7683	3.60824	3.40394	5.63713	2.16829	2.74456	2.28296	4.51142	0
mmu-miR-291b-3p	MIMAT0003190	0.587878	0.0896007	2.0702	1	0	13	4	1	0	0	0	0	0	1.82463	0	1.69397	0	1.73024	0	0	0	0	0
mmu-miR-7211-3p	MIMAT0028391	0.604975	0.0933327	2.03546	48	68	601	1461	58	213	204	103	87	181	7.4096	7.85576	7.22475	8.21624	7.58822	6.73308	7.09506	5.26903	7.49493	6.57571
mmu-miR-384-3p	MIMAT0001076	0.604975	0.0943756	2.69311	1	4	72	12	2	11	3	2	0	17	1.82463	3.7683	4.16345	1.28847	2.73024	2.4578	1.0076	0	0	3.16333
mmu-miR-219b-5p	MIMAT0029806	0.610964	0.0968901	2.37709	4	1	56	35	5	14	12	12	2	0	3.82463	1.7683	3.80088	2.83279	4.05216	2.80572	3.0076	2.16749	2.05199	0
mmu-miR-499-5p	MIMAT0003482	0.610964	0.0971713	2.15068	0	2	4	10	1	0	0	0	0	0	0	2.7683	0	1.02543	1.73024	0	0	0	0	0
mmu-let-7k	MIMAT0025580	0.610964	0.0972415	3.73642	254	98	61	87	131	75	59	43	25	74	9.81332	8.38301	3.92427	4.14645	8.76366	5.22719	5.30528	4.00879	5.69584	5.28532
mmu-miR-7674-3p	MIMAT0029857	0.614201	0.0986646	2.05359	6	5	26	82	9	8	12	32	4	19	4.4096	4.09023	2.69397	4.06105	4.90016	1.99837	3.0076	3.58252	3.05199	3.32379
mmu-miR-6417	MIMAT0025172	0.614201	0.0993263	2.36862	0	4	9	12	0	0	0	0	0	0	0	3.7683	1.16345	1.28847	0	0	0	0	0	0
mmu-miR-1894-3p	MIMAT0007878	0.614201	0.0995995	2.01928	5	17	105	63	13	36	17	34	5	31	4.14656	5.85576	4.70777	3.68078	5.43067	4.16829	3.5101	3.66999	3.37391	4.03006
mmu-miR-7049-5p	MIMAT0028002	0.614201	0.101683	2.43992	3	8	24	28	6	13	14	12	4	0	3.4096	4.7683	2.57849	2.51086	4.3152	2.69881	3.22999	2.16749	3.05199	0
mmu-miR-195a-3p	MIMAT0017000	0.614201	0.103502	2.231	2	0	22	7	0	0	0	0	0	0	2.82463	0	2.45296	0.510857	0	0	0	0	0	0
mmu-miR-686	MIMAT0003464	0.614201	0.103625	2.40724	3	1	30	133	2	17	4	17	2	0	3.4096	1.7683	2.90042	4.75878	2.73024	3.08583	1.42263	2.66999	2.05199	0
mmu_piR_000366/gb/DQ540412/Mus_musculus:6:86369552:86369578:Plus	GenBank:DQ540412	0.614201	0.103963	2.70532	11	5	73	322	2	59	14	4	4	20	5.28407	4.09023	4.18335	6.03442	2.73024	4.88101	3.22999	0.582525	3.05199	3.39779
mmu-miR-7065-5p	MIMAT0028034	0.614201	0.105385	2.3947	3	1	55	92	5	19	11	18	2	0	3.4096	1.7683	3.77489	4.22706	4.05216	3.24629	2.88207	2.75245	2.05199	0
mmu-miR-3964	MIMAT0019344	0.614201	0.105525	2.21775	3	2	44	41	2	6	5	21	5	0	3.4096	2.7683	3.45296	3.06105	2.73024	1.58333	1.74456	2.97484	3.37391	0
mmu-miR-199a-3p/mmu-miR-199b-3p	MIMAT0000230|MIMAT0004667	0.614201	0.105535	3.48919	31	101	55	22	28	53	35	13	9	14	6.77883	8.42651	3.77489	2.16293	6.53759	4.72629	4.55192	2.28296	4.22191	2.88322
mmu-miR-489-3p	MIMAT0003112	0.614201	0.106194	2.38591	0	4	16	7	0	0	0	0	0	0	0	3.7683	1.99353	0.510857	0	0	0	0	0	0
mmu-miR-3091-3p	MIMAT0014904	0.614201	0.106644	2.21566	6	2	19	18	2	12	5	10	2	0	4.4096	2.7683	2.24146	1.87343	2.73024	2.58333	1.74456	1.90445	2.05199	0
mmu-miR-8109	MIMAT0031415	0.614201	0.107308	2.09865	17	7	57	108	13	17	35	32	13	14	5.9121	4.57566	3.82642	4.45839	5.43067	3.08583	4.55192	3.58252	4.75242	2.88322
mmu-miR-145a-5p	MIMAT0000157	0.614201	0.10774	2.6181	8	2	53	187	8	16	17	37	8	0	4.82463	2.7683	3.72145	5.2504	4.73024	2.99837	3.5101	3.79198	4.05199	0
mmu-miR-302c-3p	MIMAT0003376	0.614201	0.108152	2.01258	1	0	8	23	0	0	0	0	0	0	1.82463	0	0.993529	2.22706	0	0	0	0	0	0
mmu-miR-3076-5p	MIMAT0014860	0.614201	0.108301	2.68755	4	4	17	312	2	15	7	15	6	0	3.82463	3.7683	2.08099	5.9889	2.73024	2.90526	2.22999	2.48942	3.63695	0
mmu-miR-8117	MIMAT0031423	0.615167	0.109874	2.75253	16	7	31	80	11	17	20	37	12	0	5.82463	4.57566	2.94772	4.02543	5.18967	3.08583	3.74456	3.79198	4.63695	0
mmu-miR-541-3p	MIMAT0017209	0.624164	0.112949	2.61028	0	0	26	92	0	0	0	0	0	0	0	0	2.69397	4.22706	0	0	0	0	0	0
mmu-let-7e-5p	MIMAT0000524	0.638609	0.12012	3.09422	951	882	1317	548	1024	567	494	366	538	587	11.7179	11.5529	8.35657	6.80153	11.7302	8.14557	8.371	7.09822	10.1234	8.27308
mmu-miR-136-3p	MIMAT0004532	0.653204	0.125538	2.60181	2	4	18	287	2	6	11	41	2	0	2.82463	3.7683	2.16345	5.86841	2.73024	1.58333	2.88207	3.94008	2.05199	0
mmu-miR-292b-3p	MIMAT0029865	0.666437	0.130968	2.2094	0	1	13	41	1	0	0	0	0	11	0	1.7683	1.69397	3.06105	1.73024	0	0	0	0	2.5353
mmu-let-7f-1-3p	MIMAT0004623	0.668347	0.132709	4.06478	58	20	17	12	37	11	13	2	18	17	7.68262	6.09023	2.08099	1.28847	6.93969	2.4578	3.12307	0	5.22191	3.16333
mmu-miR-101a-5p	MIMAT0004526	0.67008	0.133399	2.56475	15	2	15	29	8	8	17	18	3	0	5.73153	2.7683	1.90042	2.56148	4.73024	1.99837	3.5101	2.75245	2.63695	0
mmu-miR-3100-3p	MIMAT0014920	0.671572	0.134383	2.09242	3	4	102	237	3	31	4	24	4	27	3.4096	3.7683	4.66595	5.59225	3.3152	3.95256	1.42263	3.16749	3.05199	3.83075
mmu-miR-367-5p	MIMAT0017214	0.676133	0.137114	2.20322	3	0	4	24	0	0	0	0	0	0	3.4096	0	0	2.28846	0	0	0	0	0	0
mmu-miR-504-3p	MIMAT0017277	0.676878	0.13787	2.16859	1	6	129	100	4	15	17	25	1	15	1.82463	4.35326	5.00476	4.34736	3.73024	2.90526	3.5101	3.22638	1.05199	2.98276
mmu-miR-206-5p	MIMAT0017004	0.681043	0.139483	2.26754	4	0	17	2	0	0	0	0	0	0	3.82463	0	2.08099	0	0	0	0	0	0	0
mmu-miR-6991-3p	MIMAT0027885	0.68125	0.142247	2.39709	25	33	53	28	13	16	21	31	13	22	6.46849	6.81269	3.72145	2.51086	5.43067	2.99837	3.81495	3.53672	4.75242	3.5353
mmu-miR-7652-5p	MIMAT0029810	0.686477	0.143689	2.90219	11	6	58	79	0	16	9	4	6	0	5.28407	4.35326	3.85151	4.00728	0	2.99837	2.59256	0.582525	3.63695	0
mmu-miR-206-3p	MIMAT0000239	0.686756	0.145106	3.42684	14	2	33	6	28	32	6	0	5	0	5.63199	2.7683	3.03792	0.288465	6.53759	3.99837	2.0076	0	3.37391	0
mmu_piR_003848/gb/DQ551015/Mus_musculus:10:18489292:18489321:Minus	GenBank:DQ551015	0.686756	0.145154	2.06976	0	0	23	1	2	0	0	0	0	0	0	0	2.51709	0	2.73024	0	0	0	0	0
mmu-miR-7239-3p	MIMAT0028447	0.687655	0.146297	2.83957	11	1	46	70	0	12	3	26	0	0	5.28407	1.7683	3.51709	3.83279	0	2.58333	1.0076	3.28296	0	0
mmu-miR-7067-3p	MIMAT0028039	0.687655	0.147701	2.21271	15	6	35	33	5	6	14	9	12	16	5.73153	4.35326	3.12281	2.7479	4.05216	1.58333	3.22999	1.75245	4.63695	3.07586
mmu-miR-1904	MIMAT0007874	0.687655	0.148159	2.40086	4	1	103	130	5	13	12	56	3	0	3.82463	1.7683	4.68003	4.72587	4.05216	2.69881	3.0076	4.38988	2.63695	0
mmu-miR-1964-5p	MIMAT0017349	0.689188	0.150203	2.19738	3	1	28	42	5	4	6	16	7	0	3.4096	1.7683	2.80088	3.09582	4.05216	0.998367	2.0076	2.58252	3.85934	0
mmu-miR-467c-3p	MIMAT0017275	0.689188	0.154125	2.15611	0	1	54	5	0	0	0	0	0	0	0	1.7683	3.74842	0.0254307	0	0	0	0	0	0
mmu_piR_007729/gb/DQ564913/Mus_musculus:17:70868542:70868571:Plus	GenBank:DQ564913	0.689188	0.154147	2.15555	3	5	45	16	2	13	11	2	1	18	3.4096	4.09023	3.48538	1.7035	2.73024	2.69881	2.88207	0	1.05199	3.24579
mmu-miR-7116-5p	MIMAT0028129	0.689188	0.154869	2.61685	28	10	54	9	9	11	10	8	6	28	6.63199	5.09023	3.74842	0.873428	4.90016	2.4578	2.74456	1.58252	3.63695	3.88322
mmu-miR-7076-5p	MIMAT0028058	0.689188	0.157511	2.02847	1	0	35	23	1	3	0	12	1	0	1.82463	0	3.12281	2.22706	1.73024	0.58333	0	2.16749	1.05199	0
mmu-miR-344c-5p	MIMAT0014927	0.689188	0.157782	2.2975	9	2	26	11	5	19	5	10	0	13	4.99456	2.7683	2.69397	1.16293	4.05216	3.24629	1.74456	1.90445	0	2.7763
mmu-miR-6936-3p	MIMAT0027773	0.689188	0.158409	2.65123	4	11	91	329	16	108	26	88	0	20	3.82463	5.22773	4.50132	6.06545	5.73024	5.75325	4.12307	5.04196	0	3.39779
mmu-miR-7079-5p	MIMAT0028064	0.689188	0.159648	2.37916	0	3	14	24	7	3	2	17	2	0	0	3.35326	1.80088	2.28846	4.53759	0.58333	0.422635	2.66999	2.05199	0
mmu-miR-7664-3p	MIMAT0029835	0.689188	0.159655	2.95737	17	8	3	7	4	11	6	8	1	0	5.9121	4.7683	0	0.510857	3.73024	2.4578	2.0076	1.58252	1.05199	0
mmu-miR-370-3p	MIMAT0001095	0.689188	0.159776	2.12502	30	22	41	50	15	23	27	38	7	42	6.73153	6.22773	3.35108	3.34736	5.63713	3.52193	4.17752	3.83045	3.85934	4.46818
mmu-miR-409-3p	MIMAT0001090	0.693785	0.163682	2.32011	5	5	15	32	0	4	7	15	1	0	4.14656	4.09023	1.90042	2.7035	0	0.998367	2.22999	2.48942	1.05199	0
mmu-miR-302b-5p	MIMAT0003373	0.695951	0.165526	2.87247	4	1	46	366	0	14	10	12	0	0	3.82463	1.7683	3.51709	6.2192	0	2.80572	2.74456	2.16749	0	0
mmu-miR-92a-2-5p	MIMAT0004635	0.697015	0.167035	3.12316	23	23	7092	52	29	26	22	55	55	163	6.3482	6.29186	10.7855	3.40394	6.58822	3.69881	3.88207	4.36388	6.83335	6.42459
mmu-miR-203-5p	MIMAT0004547	0.700719	0.169263	2.22271	4	1	14	43	8	9	11	28	1	0	3.82463	1.7683	1.80088	3.12977	4.73024	2.16829	2.88207	3.38988	1.05199	0
mmu-miR-3074-5p	MIMAT0014856	0.705288	0.172532	2.60471	33	35	27	44	43	27	25	20	27	20	6.86903	6.89758	2.74842	3.16293	7.1565	3.75325	4.06649	2.90445	5.80687	3.39779
mmu-miR-688	MIMAT0003467	0.706305	0.173312	2.21003	0	0	29	19	3	0	0	0	0	10	0	0	2.85151	1.95143	3.3152	0	0	0	0	2.39779
mmu-miR-7013-5p	MIMAT0027930	0.706305	0.173504	2.14893	0	3	39	18	2	12	5	7	0	0	0	3.35326	3.27893	1.87343	2.73024	2.58333	1.74456	1.38988	0	0
mmu-miR-669c-5p	MIMAT0003479	0.706632	0.174717	2.79152	27	15	62	14	6	8	40	3	12	16	6.57952	5.67519	3.94772	1.51086	4.3152	1.99837	4.74456	0.167487	4.63695	3.07586
mmu-miR-1291	MIMAT0031397	0.710001	0.177834	2.25222	1	0	39	48	0	0	0	0	0	11	1.82463	0	3.27893	3.28846	0	0	0	0	0	2.5353
mmu-miR-1897-3p	MIMAT0007865	0.710001	0.180267	2.12128	12	4	456	401	9	26	132	27	14	21	5.4096	3.7683	6.82642	6.35096	4.90016	3.69881	6.46703	3.33741	4.85934	3.46818
mmu-miR-7682-3p	MIMAT0029885	0.710001	0.180993	2.1081	2	4	25	16	7	14	10	6	5	0	2.82463	3.7683	2.63738	1.7035	4.53759	2.80572	2.74456	1.16749	3.37391	0
mmu-miR-5124a	MIMAT0020634	0.710001	0.182458	2.1414	3	2	33	31	0	7	5	19	0	0	3.4096	2.7683	3.03792	2.6577	0	1.80572	1.74456	2.83045	0	0
mmu-miR-5618-5p	MIMAT0022363	0.710001	0.184234	2.23663	73	5	65	40	9	21	15	23	13	24	8.01446	4.09023	4.0159	3.02543	4.90016	3.39068	3.32952	3.10609	4.75242	3.66083
mmu-miR-1843b-5p	MIMAT0019345	0.710001	0.185371	2.10906	7	1	18	14	2	11	10	3	2	0	4.63199	1.7683	2.16345	1.51086	2.73024	2.4578	2.74456	0.167487	2.05199	0
mmu-miR-218-5p	MIMAT0000663	0.710001	0.186849	3.38433	68	66	406	41	300	57	192	12	146	39	7.9121	7.81269	6.65886	3.06105	9.95905	4.83126	7.0076	2.16749	8.24181	4.36127
mmu-miR-7068-5p	MIMAT0028042	0.710001	0.189496	2.40297	12	5	26	10	2	8	19	4	5	0	5.4096	4.09023	2.69397	1.02543	2.73024	1.99837	3.67056	0.582525	3.37391	0
mmu-miR-135b-5p	MIMAT0000612	0.710001	0.189663	2.02875	4	15	36	29	7	9	10	10	14	15	3.82463	5.67519	3.16345	2.56148	4.53759	2.16829	2.74456	1.90445	4.85934	2.98276
mmu-miR-7237-3p	MIMAT0028443	0.710001	0.190875	2.3029	1	15	17	59	3	16	17	5	4	0	1.82463	5.67519	2.08099	3.58615	3.3152	2.99837	3.5101	0.904453	3.05199	0
mmu-miR-9-5p	MIMAT0000142	0.710001	0.193359	2.99028	15	36	36	11	9	6	62	2	10	12	5.73153	6.93823	3.16345	1.16293	4.90016	1.58333	5.37683	0	4.37391	2.66083
mmu-miR-488-3p	MIMAT0003450	0.713267	0.196751	2.07173	8	5	24	22	2	9	15	32	2	0	4.82463	4.09023	2.57849	2.16293	2.73024	2.16829	3.32952	3.58252	2.05199	0
mmu_piR_038323/gb/piRNA-T34/Mus_musculus:13:44880547:44880577:Minus	GenBank:piRNA-T34	0.725218	0.204872	2.07269	12	2	39	26	3	28	7	0	3	18	5.4096	2.7683	3.27893	2.40394	3.3152	3.80572	2.22999	0	2.63695	3.24579
mmu-miR-6400	MIMAT0025152	0.72539	0.210636	2.61344	2	4	268	629	2	133	7	4	4	22	2.82463	3.7683	6.05962	7.00042	2.73024	6.05365	2.22999	0.582525	3.05199	3.5353
mmu-miR-3472	MIMAT0015643	0.737735	0.221245	2.15192	5	1	79	71	0	13	5	11	2	0	4.14656	1.7683	4.29731	3.85325	0	2.69881	1.74456	2.04196	2.05199	0
mmu-miR-7669-3p	MIMAT0029845	0.739636	0.223168	2.65922	14	3	13	15	6	5	8	2	27	0	5.63199	3.35326	1.69397	1.61039	4.3152	1.3203	2.42263	0	5.80687	0
mmu_piR_000691/gb/DQ541218/Mus_musculus:8:126424875:126424900:Minus	GenBank:DQ541218	0.741762	0.227801	2.25277	5	5	9	14	3	34	14	1	1	0	4.14656	4.09023	1.16345	1.51086	3.3152	4.08583	3.22999	0	1.05199	0
mmu_piR_000366/gb/DQ540412/Mus_musculus:17:25602713:25602739:Plus	GenBank:DQ540412	0.748454	0.235185	2.15675	2	5	14	68	0	30	4	4	1	0	2.82463	4.09023	1.80088	3.79097	0	3.90526	1.42263	0.582525	1.05199	0
mmu-miR-7650-5p	MIMAT0029802	0.74883	0.236282	2.06134	9	4	41	20	7	43	8	18	7	0	4.99456	3.7683	3.35108	2.02543	4.53759	4.42463	2.42263	2.75245	3.85934	0
mmu-miR-33-5p	MIMAT0000667	0.75067	0.240067	2.12293	3	5	15	10	5	13	1	15	7	0	3.4096	4.09023	1.90042	1.02543	4.05216	2.69881	0	2.48942	3.85934	0
mmu-miR-1306-5p	MIMAT0019136	0.75067	0.240414	2.05113	14	10	31	24	6	20	10	5	17	15	5.63199	5.09023	2.94772	2.28846	4.3152	3.3203	2.74456	0.904453	5.13945	2.98276
mmu-miR-7021-3p	MIMAT0027947	0.757496	0.252412	2.10515	1	1	41	171	0	19	3	7	1	0	1.82463	1.7683	3.35108	5.12136	0	3.24629	1.0076	1.38988	1.05199	0
mmu_piR_000935/gb/DQ541777/Mus_musculus:6:47717737:47717766:Minus	GenBank:DQ541777	0.757496	0.253375	3.09139	9	17	7	4	15	2	51	0	8	0	4.99456	5.85576	0.800884	0	5.63713	0	5.09506	0	4.05199	0
mmu-miR-429-3p	MIMAT0001537	0.758344	0.256145	2.55103	1209	582	1400	344	1029	384	1268	156	448	1405	12.0642	10.9532	8.44474	6.12977	11.7373	7.58333	9.73097	5.86793	9.85934	9.53222
mmu-let-7d-5p	MIMAT0000383	0.764538	0.264083	3.42245	1191	421	529	70	712	209	535	19	293	670	12.0426	10.486	7.04065	3.83279	11.206	6.70573	8.48603	2.83045	9.24674	8.46388
mmu-let-7a-1-3p/mmu-let-7c-2-3p		0.764538	0.264497	3.80041	285	122	65	10	242	58	82	4	79	68	9.97945	8.69904	4.0159	1.02543	9.6491	4.85635	5.78019	0.582525	7.35577	5.16333
mmu-miR-21b	MIMAT0025121	0.767365	0.266462	2.70117	36	8	9	5	20	28	7	2	3	17	6.99456	4.7683	1.16345	0.0254307	6.05216	3.80572	2.22999	0	2.63695	3.16333
mmu-miR-27b-3p	MIMAT0000126	0.767365	0.271501	2.69447	375	658	1288	138	868	324	1242	67	328	449	10.3754	11.1302	8.32445	4.81203	11.4918	7.33822	9.70108	4.64861	9.40954	7.88644
mmu-miR-141-3p	MIMAT0000153	0.771929	0.277498	2.81553	2424	738	1655	276	967	581	2072	94	177	3303	13.0678	11.2958	8.68614	5.81203	11.6476	8.18076	10.4394	5.13711	8.51959	10.7654
mmu-miR-3970	MIMAT0019355	0.774701	0.280744	2.95924	123	23	20	2	28	12	12	6	21	28	8.76715	6.29186	2.31546	0	6.53759	2.58333	3.0076	1.16749	5.4443	3.88322
mmu-miR-29b-3p	MIMAT0000127	0.780225	0.305677	2.20868	199	133	336	81	160	147	296	32	96	243	9.46126	8.82358	6.38585	4.04335	9.05216	6.19804	7.63209	3.58252	7.63695	7.00068
mmu-miR-98-5p	MIMAT0000545	0.781621	0.311945	3.02493	285	134	144	15	241	77	140	8	97	139	9.97945	8.83439	5.16345	1.61039	9.64312	5.26515	6.55192	1.58252	7.6519	6.19481
mmu-let-7b-3p	MIMAT0004621	0.782011	0.316566	2.63437	1392	443	271	92	784	255	292	161	273	430	12.2676	10.5595	6.07568	4.22706	11.3449	6.99272	7.61246	5.91344	9.14474	7.82406
mmu-miR-200b-3p	MIMAT0000233	0.796167	0.332194	2.3992	1614	621	1507	199	956	982	1803	126	135	1778	12.4811	11.0467	8.55099	5.34013	11.6311	8.93795	10.2388	5.5598	8.1288	9.8719
mmu-miR-23b-3p	MIMAT0000125	0.796167	0.332527	2.61365	130	210	480	39	296	110	348	13	260	142	8.847	9.48255	6.90042	2.9889	9.93969	5.77973	7.86558	2.28296	9.07435	6.22561
mmu_piR_017477/gb/DQ697102/Mus_musculus:18:67167758:67167788:Minus	GenBank:DQ697102	0.798043	0.337707	2.43779	20	2	4	0	22	5	15	3	7	0	6.14656	2.7683	0	0	6.18967	1.3203	3.32952	0.167487	3.85934	0
mmu-miR-152-3p	MIMAT0000162	0.798043	0.345592	2.27481	398	249	355	81	205	182	697	42	44	606	10.4613	9.7283	6.4652	4.04335	9.40972	6.50616	8.86765	3.97484	6.51142	8.31904
mmu-miR-101a-3p	MIMAT0000133	0.798043	0.346767	2.27072	164	87	189	24	97	87	174	16	40	159	9.18219	8.21124	5.55577	2.28846	8.33015	5.44131	6.86558	2.58252	6.37391	6.38875
mmu-let-7g-5p	MIMAT0000121	0.80383	0.355182	2.53785	796	496	883	75	506	241	1107	36	213	910	11.4613	10.7225	7.7798	3.93232	10.7132	6.91126	9.53507	3.75245	8.7867	8.90559
mmu-let-7b-5p	MIMAT0000522	0.814602	0.364778	2.62039	21299	13782	22759	1701	18164	9875	17243	662	8401	26135	16.2031	15.5188	12.4677	8.43567	15.879	12.2679	13.4964	7.95321	14.0883	13.7496
mmu-miR-200c-3p	MIMAT0000657	0.816533	0.367202	2.52933	2160	1347	3488	280	2107	2838	3173	65	662	2211	12.9015	12.1638	9.76171	5.83279	12.7712	10.469	11.0543	4.60489	10.4227	10.1863
mmu-miR-148a-3p	MIMAT0000516	0.817224	0.368462	2.58803	8832	8223	16069	887	7599	8650	25526	368	983	12565	14.9332	14.7737	11.9655	7.49629	14.6218	12.0769	14.0623	7.10609	10.993	12.693
mmu-miR-22-3p	MIMAT0000531	0.820268	0.372938	2.19463	56	31	86	15	26	40	83	3	27	63	7.63199	6.7225	4.41979	1.61039	6.43067	4.3203	5.79767	0.167487	5.80687	5.05314
mmu-miR-672-5p	MIMAT0003735	0.821075	0.378698	2.22824	63	49	176	16	70	37	80	6	42	220	7.80191	7.38301	5.45296	1.7035	7.85952	4.20782	5.74456	1.16749	6.4443	6.85722
mmu-miR-143-3p	MIMAT0000247	0.821075	0.382191	2.25783	117	172	87	68	380	165	495	23	80	76	8.695	9.19457	4.43647	3.79097	10.3001	6.36469	8.37392	3.10609	7.37391	5.32379
mmu-miR-1a-3p	MIMAT0000123	0.828476	0.389817	2.23696	0	47	52	6	4	6	12	0	12	0	0	7.32289	3.69397	0.288465	3.73024	1.58333	3.0076	0	4.63695	0
mmu-miR-195a-5p	MIMAT0000225	0.828476	0.390495	2.27773	42	28	51	7	39	22	53	3	39	29	7.21695	6.57566	3.66595	0.510857	7.01564	3.4578	5.15055	0.167487	6.33739	3.93385
mmu-let-7c-5p	MIMAT0000523	0.833529	0.398925	2.45638	21340	17499	26765	1841	21895	15673	25374	767	9327	23457	16.2059	15.8633	12.7016	8.54978	16.1485	12.9344	14.0537	8.16561	14.2392	13.5936
mmu-let-7a-5p	MIMAT0000521	0.835532	0.401945	2.5723	13527	8321	14942	858	10498	4252	11614	305	8520	15528	15.5482	14.7908	11.8606	7.44834	15.0881	11.0523	12.9262	6.83519	14.1086	12.9984
mmu-miR-182-5p	MIMAT0000211	0.840261	0.406819	2.25405	1065	1297	2102	281	2075	769	3225	107	1486	1093	11.8813	12.1093	9.03108	5.83793	12.7491	8.58521	11.0777	5.32399	11.5892	9.16994
mmu-miR-21a-5p	MIMAT0000530	0.840261	0.408181	2.22354	3661	1704	4474	410	2515	6916	3978	186	457	3354	13.6627	12.503	10.1209	6.38298	13.0266	11.7541	11.3805	6.12168	9.88804	10.7875
mmu-miR-96-5p	MIMAT0000541	0.840261	0.40959	2.20841	44	46	96	12	50	32	151	3	36	63	7.28407	7.29186	4.57849	1.28847	7.37409	3.99837	6.66104	0.167487	6.22191	5.05314
mmu-let-7f-5p	MIMAT0000525	0.864103	0.479812	2.16428	15809	10531	21020	1278	14026	10833	19031	454	11148	18754	15.7731	15.1307	12.353	8.02317	15.5061	12.4015	13.6387	7.40907	14.4965	13.2708
mmu-miR-203-3p	MIMAT0000236	0.875021	0.513746	2.04932	1004	3718	2157	140	471	1646	1430	55	1878	895	11.7962	13.6286	9.06834	4.83279	10.6098	9.68312	9.90443	4.36388	11.927	8.88161
mmu-miR-679-3p	MIMAT0017248	0.875021	0.520117	2.09459	2	166	95	64	1	1308	1	10	2	19	2.82463	9.14334	4.56338	3.7035	1.73024	9.35151	0	1.90445	2.05199	3.32379

## Sheet: Supplementary Table S2.
Supplementary Table S2. The list of salivary miRNAs downregulated by sCSDS (Fold change < -2).
					Read counts (raw)										Normalized read counts
Name	Accession_ID	q value	p value	Fold change	sCSDS#1	sCSDS#2	sCSDS#3	sCSDS#4	sCSDS#5	Control#1	Control#2	Control#3	Control#4	Control#5	sCSDS#1	sCSDS#2	sCSDS#3	sCSDS#4	sCSDS#5	Control#1	Control#2	Control#3	Control#4	Control#5
mmu-miR-3106-3p	MIMAT0014818	0.0925811	0.000331662	-9.11736	0	1	4	12	0	33	35	15	17	13	0	1.7683	0	1.28847	0	4.04276	4.55192	2.48942	5.13945	2.7763
mmu-miR-6962-3p	MIMAT0027825	0.12275	0.00116587	-5.49764	0	0	17	12	0	27	12	15	6	13	0	0	2.08099	1.28847	0	3.75325	3.0076	2.48942	3.63695	2.7763
mmu_piR_038312/gb/piRNA-T12/Mus_musculus:9:56021996:56022022:Minus	GenBank:piRNA-T12	0.175418	0.00251366	-7.57529	0	0	0	0	0	12	29	0	14	14	0	0	0	0	0	2.58333	4.28062	0	4.85934	2.88322
mmu-miR-7665-5p	MIMAT0029836	0.218888	0.00369667	-5.18209	0	1	25	37	1	32	26	139	5	25	0	1.7683	2.63738	2.91296	1.73024	3.99837	4.12307	5.70147	3.37391	3.71972
mmu-miR-491-3p	MIMAT0017255	0.301693	0.00633031	-6.72935	1	1	74	160	1	223	29	339	8	138	1.82463	1.7683	4.20298	5.02543	1.73024	6.79927	4.28062	6.98767	4.05199	6.18439
mmu-miR-135a-5p	MIMAT0000147	0.305523	0.00657796	-15.6001	2	4	90	1091	0	336	1072	1636	13	423	2.82463	3.7683	4.48538	7.79494	0	7.39068	9.48872	9.25848	4.75242	7.80038
mmu-miR-301b-3p	MIMAT0004186	0.330182	0.00907084	-3.60759	0	0	0	0	0	7	6	14	4	0	0	0	0	0	0	1.80572	2.0076	2.38988	3.05199	0
mmu-miR-344-5p	MIMAT0017038	0.330182	0.00919219	-4.68379	0	1	25	67	1	79	13	75	5	41	0	1.7683	2.63738	3.76959	1.73024	5.30215	3.12307	4.81134	3.37391	4.43342
mmu-miR-6946-5p	MIMAT0027792	0.330182	0.00868162	-4.09464	1	0	25	14	0	16	10	15	10	22	1.82463	0	2.63738	1.51086	0	2.99837	2.74456	2.48942	4.37391	3.5353
mmu-miR-7651-3p	MIMAT0029805	0.330182	0.00929375	-3.41281	0	0	0	0	0	9	6	11	3	0	0	0	0	0	0	2.16829	2.0076	2.04196	2.63695	0
mmu-miR-1298-5p	MIMAT0014809	0.336629	0.00970063	-3.78628	1	1	34	40	0	25	27	35	8	25	1.82463	1.7683	3.08099	3.02543	0	3.64222	4.17752	3.71181	4.05199	3.71972
mmu-miR-188-3p	MIMAT0004541	0.336629	0.0123551	-7.02132	2	3	215	663	1	239	654	299	18	257	2.82463	3.35326	5.74172	7.07637	1.73024	6.89923	8.77578	6.80653	5.22191	7.08149
mmu-miR-3083-5p	MIMAT0014874	0.336629	0.0115925	-3.69191	0	0	0	0	0	16	11	15	1	0	0	0	0	0	0	2.99837	2.88207	2.48942	1.05199	0
mmu-miR-3547-3p	MIMAT0027833	0.336629	0.0126306	-4.39672	1	0	21	84	2	16	44	93	11	35	1.82463	0	2.38585	4.09582	2.73024	2.99837	4.88207	5.12168	4.51142	4.20515
mmu-miR-376b-3p	MIMAT0001092	0.336629	0.0121215	-3.40434	0	0	0	0	0	10	4	11	4	0	0	0	0	0	0	2.3203	1.42263	2.04196	3.05199	0
mmu-miR-411-3p	MIMAT0001093	0.336629	0.0124158	-6.28582	0	1	112	233	2	177	49	168	15	98	0	1.7683	4.80088	5.56769	2.73024	6.46597	5.03734	5.97484	4.95888	5.69057
mmu-miR-421-5p	MIMAT0017273	0.336629	0.0111445	-3.40588	0	0	0	0	0	12	7	7	3	0	0	0	0	0	0	2.58333	2.22999	1.38988	2.63695	0
mmu-miR-6959-5p	MIMAT0027818	0.336629	0.0133246	-3.72931	1	2	43	43	0	29	32	46	9	31	1.82463	2.7683	3.41979	3.12977	0	3.85635	4.42263	4.10609	4.22191	4.03006
mmu-miR-7071-3p	MIMAT0028049	0.336629	0.0114636	-6.81095	0	0	33	114	0	34	37	159	3	34	0	0	3.03792	4.53639	0	4.08583	4.63209	5.89541	2.63695	4.16333
mmu-miR-7218-3p	MIMAT0028405	0.336629	0.0106263	-4.19459	0	0	0	0	0	7	17	7	6	0	0	0	0	0	0	1.80572	3.5101	1.38988	3.63695	0
mmu-miR-3969	MIMAT0019353	0.36091	0.014869	-3.8075	0	0	0	0	0	4	10	11	7	0	0	0	0	0	0	0.998367	2.74456	2.04196	3.85934	0
mmu_piR_009283/gb/DQ569856/Mus_musculus:18:67191026:67191055:Minus	GenBank:DQ569856	0.36091	0.0149035	-3.34837	0	0	0	0	0	9	3	20	3	0	0	0	0	0	0	2.16829	1.0076	2.90445	2.63695	0
mmu-miR-6994-3p	MIMAT0027891	0.363256	0.01543	-4.37073	5	0	46	48	1	36	39	45	12	101	4.14656	0	3.51709	3.28846	1.73024	4.16829	4.70804	4.07438	4.63695	5.73408
mmu-miR-340-3p	MIMAT0000586	0.365183	0.0157825	-3.31462	0	0	0	0	0	14	11	10	1	0	0	0	0	0	0	2.80572	2.88207	1.90445	1.05199	0
mmu-miR-6973b-3p	MIMAT0027909	0.365183	0.0158856	-4.73084	19	12	929	258	4	983	534	284	43	1197	6.07256	5.35326	7.85306	5.71473	3.73024	8.93942	8.48333	6.73227	6.47825	9.30107
mmu-miR-3092-3p	MIMAT0014906	0.369462	0.0165718	-3.04942	1	1	51	60	1	29	28	46	10	32	1.82463	1.7683	3.66595	3.61039	1.73024	3.85635	4.22999	4.10609	4.37391	4.07586
mmu_piR_000691/gb/DQ541218/Mus_musculus:11:74136081:74136106:Plus	GenBank:DQ541218	0.369462	0.0168281	-5.28479	0	0	0	0	0	33	18	1	10	0	0	0	0	0	0	4.04276	3.59256	0	4.37391	0
mmu-miR-6917-3p	MIMAT0027735	0.381709	0.0175813	-4.61861	0	3	23	27	0	14	48	102	3	24	0	3.35326	2.51709	2.45839	0	2.80572	5.0076	5.25495	2.63695	3.66083
mmu-miR-6961-3p	MIMAT0027823	0.38246	0.0178116	-3.02944	0	1	13	17	2	17	16	34	3	17	0	1.7683	1.69397	1.79097	2.73024	3.08583	3.42263	3.66999	2.63695	3.16333
mmu-miR-330-5p	MIMAT0004642	0.387314	0.0188933	-3.32398	0	0	14	34	1	13	10	38	3	16	0	0	1.80088	2.79097	1.73024	2.69881	2.74456	3.83045	2.63695	3.07586
mmu-miR-6932-5p	MIMAT0027764	0.387314	0.0190287	-5.137	1	8	131	104	0	65	92	142	25	82	1.82463	4.7683	5.02695	4.40394	0	5.02074	5.9462	5.73227	5.69584	5.43342
mmu-miR-7082-5p	MIMAT0028070	0.387314	0.0188032	-4.04545	0	5	27	81	3	38	38	129	14	57	0	4.09023	2.74842	4.04335	3.3152	4.24629	4.67056	5.59375	4.85934	4.90875
mmu-miR-1949	MIMAT0009416	0.389032	0.0193122	-2.95279	0	0	0	0	0	8	9	12	1	0	0	0	0	0	0	1.99837	2.59256	2.16749	1.05199	0
mmu-miR-7004-5p	MIMAT0027912	0.393861	0.0205598	-3.80317	0	2	21	88	2	31	29	76	18	20	0	2.7683	2.38585	4.16293	2.73024	3.95256	4.28062	4.83045	5.22191	3.39779
mmu-miR-698-3p	MIMAT0003488	0.394614	0.0208054	-3.19198	1	3	72	71	1	87	22	69	10	57	1.82463	3.35326	4.16345	3.85325	1.73024	5.44131	3.88207	4.69105	4.37391	4.90875
mmu-miR-1948-3p	MIMAT0009415	0.39674	0.0219283	-5.73124	1	3	134	12	0	27	26	408	5	93	1.82463	3.35326	5.05962	1.28847	0	3.75325	4.12307	7.25495	3.37391	5.61502
mmu-miR-3084-5p	MIMAT0014876	0.39674	0.0215458	-6.56833	0	3	50	133	0	33	108	454	5	38	0	3.35326	3.63738	4.75878	0	4.04276	6.17752	7.40907	3.37391	4.32379
mmu-miR-7017-5p	MIMAT0027938	0.39674	0.0218079	-3.42177	3	6	39	131	1	52	82	262	13	44	3.4096	4.35326	3.27893	4.73693	1.73024	4.69881	5.78019	6.61595	4.75242	4.5353
mmu-miR-6984-5p	MIMAT0027870	0.397562	0.0221772	-4.46245	1	4	265	416	5	310	62	485	40	155	1.82463	3.7683	6.04338	6.40394	4.05216	7.27449	5.37683	7.50437	6.37391	6.35199
mmu-miR-7048-5p	MIMAT0028000	0.405196	0.0230178	-3.89378	4	4	145	292	1	209	57	176	18	238	3.82463	3.7683	5.17344	5.89333	1.73024	6.70573	5.25552	6.04196	5.22191	6.97068
mmu-miR-7226-3p	MIMAT0028421	0.416689	0.0245237	-4.58157	6	0	103	117	4	149	117	186	9	87	4.4096	0	4.68003	4.57387	3.73024	6.21754	6.293	6.12168	4.22191	5.51881
mmu-miR-194-2-3p	MIMAT0017073	0.42254	0.0265246	-3.24045	1	0	21	41	0	12	15	32	5	14	1.82463	0	2.38585	3.06105	0	2.58333	3.32952	3.58252	3.37391	2.88322
mmu-miR-6715-5p	MIMAT0029876	0.42254	0.0270305	-3.08185	3	2	26	20	1	51	20	13	17	57	3.4096	2.7683	2.69397	2.02543	1.73024	4.67079	3.74456	2.28296	5.13945	4.90875
mmu-miR-6906-3p	MIMAT0027713	0.42254	0.0268018	-4.44775	2	20	66	213	1	111	304	262	40	41	2.82463	6.09023	4.03792	5.43821	1.73024	5.79278	7.67056	6.61595	6.37391	4.43342
mmu-miR-6914-5p	MIMAT0027728	0.42254	0.0260438	-4.38785	0	0	36	50	3	17	91	41	5	34	0	0	3.16345	3.34736	3.3152	3.08583	5.93043	3.94008	3.37391	4.16333
mmu-miR-7025-5p	MIMAT0027954	0.42254	0.026108	-4.90669	0	0	39	149	0	40	20	49	6	26	0	0	3.27893	4.92267	0	4.3203	3.74456	4.19723	3.63695	3.7763
mmu-miR-7027-5p	MIMAT0027958	0.42254	0.0262045	-3.07952	1	0	32	11	1	32	6	23	6	16	1.82463	0	2.99353	1.16293	1.73024	3.99837	2.0076	3.10609	3.63695	3.07586
mmu-miR-7672-3p	MIMAT0029851	0.42254	0.0255156	-3.15845	0	0	8	24	0	7	11	29	1	10	0	0	0.993529	2.28846	0	1.80572	2.88207	3.44051	1.05199	2.39779
mmu_piR_000691/gb/DQ541218/Mus_musculus:8:126463844:126463869:Minus	GenBank:DQ541218	0.42254	0.026313	-4.51381	0	0	0	0	0	9	30	0	10	0	0	0	0	0	0	2.16829	4.32953	0	4.37391	0
mmu-miR-3475-3p	MIMAT0015219	0.425347	0.027896	-3.57463	1	0	21	36	0	13	29	59	2	13	1.82463	0	2.38585	2.87343	0	2.69881	4.28062	4.46517	2.05199	2.7763
mmu-miR-7650-3p	MIMAT0029803	0.429381	0.0294458	-3.07081	0	1	51	11	1	16	13	20	7	22	0	1.7683	3.66595	1.16293	1.73024	2.99837	3.12307	2.90445	3.85934	3.5353
mmu-miR-99b-3p	MIMAT0004525	0.444636	0.030947	-3.09908	0	3	31	46	2	41	27	55	8	21	0	3.35326	2.94772	3.22706	2.73024	4.35592	4.17752	4.36388	4.05199	3.46818
mmu-miR-7673-3p	MIMAT0029853	0.445085	0.0312061	-5.01419	0	2	48	174	0	14	44	122	12	74	0	2.7683	3.57849	5.14645	0	2.80572	4.88207	5.51326	4.63695	5.28532
mmu-miR-5710	MIMAT0022505	0.44927	0.0319053	-3.73242	0	2	81	59	6	104	25	87	12	64	0	2.7683	4.33338	3.58615	4.3152	5.69881	4.06649	5.02547	4.63695	5.07586
mmu-miR-434-3p	MIMAT0001422	0.449784	0.0329166	-4.70129	1	10	112	139	0	150	37	177	13	125	1.82463	5.09023	4.80088	4.82244	0	6.22719	4.63209	6.05013	4.75242	6.04165
mmu-miR-5098	MIMAT0020605	0.449784	0.03287	-3.01895	0	0	23	13	0	17	4	8	3	17	0	0	2.51709	1.40394	0	3.08583	1.42263	1.58252	2.63695	3.16333
mmu-miR-6961-5p	MIMAT0027822	0.449784	0.0323717	-2.93322	1	0	23	22	0	20	15	12	4	10	1.82463	0	2.51709	2.16293	0	3.3203	3.32952	2.16749	3.05199	2.39779
mmu_piR_027673/gb/DQ711996/Mus_musculus:11:106317081:106317102:Plus	GenBank:DQ711996	0.457168	0.0339249	-4.49357	0	0	0	0	0	6	40	1	11	0	0	0	0	0	0	1.58333	4.74456	0	4.51142	0
mmu-miR-344e-5p/mmu-miR-344h-5p	MIMAT0014923|MIMAT0022383	0.460559	0.0344123	-3.99317	0	0	0	0	0	8	0	23	0	56	0	0	0	0	0	1.99837	0	3.10609	0	4.88322
mmu_piR_000691/gb/DQ541218/Mus_musculus:8:126509726:126509751:Minus	GenBank:DQ541218	0.466094	0.0350644	-3.30709	0	0	0	0	0	15	19	0	2	0	0	0	0	0	0	2.90526	3.67056	0	2.05199	0
mmu-miR-155-3p	MIMAT0016993	0.469644	0.0374946	-2.89221	0	0	13	8	0	12	6	19	3	0	0	0	1.69397	0.703503	0	2.58333	2.0076	2.83045	2.63695	0
mmu-miR-362-3p	MIMAT0004684	0.469644	0.037398	-5.78484	1	3	133	223	0	262	34	469	4	154	1.82463	3.35326	5.04881	5.5044	0	7.03179	4.5101	7.45597	3.05199	6.34265
mmu-miR-6917-5p	MIMAT0027734	0.469644	0.0363396	-4.97129	3	13	212	953	5	207	1972	522	14	594	3.4096	5.46874	5.72145	7.59983	4.05216	6.69185	10.3681	7.61043	4.85934	8.29018
mmu-miR-7009-3p	MIMAT0027923	0.469644	0.0364441	-4.21291	1	0	195	85	2	33	43	63	20	107	1.82463	0	5.60086	4.11289	2.73024	4.04276	4.8489	4.5598	5.37391	5.81733
mmu-miR-6915-5p	MIMAT0027730	0.476109	0.0391199	-3.745	2	0	55	114	2	17	99	68	18	39	2.82463	0	3.77489	4.53639	2.73024	3.08583	6.05199	4.66999	5.22191	4.36127
mmu-miR-6981-3p	MIMAT0027865	0.476109	0.0389455	-3.11115	0	0	0	0	0	10	7	2	6	0	0	0	0	0	0	2.3203	2.22999	0	3.63695	0
mmu-miR-6979-5p	MIMAT0027860	0.481208	0.0402071	-3.25869	5	5	478	339	4	426	95	186	27	434	4.14656	4.09023	6.8944	6.10864	3.73024	7.73308	5.99249	6.12168	5.80687	7.83742
mmu-miR-7022-3p	MIMAT0027949	0.481208	0.0416139	-4.70052	0	0	49	137	3	36	16	288	6	57	0	0	3.60824	4.80153	3.3152	4.16829	3.42263	6.75245	3.63695	4.90875
mmu_piR_000858/gb/DQ541610/Mus_musculus:2:126256744:126256772:Plus	GenBank:DQ541610	0.487034	0.042871	-3.59063	0	0	0	0	0	10	43	1	2	0	0	0	0	0	0	2.3203	4.8489	0	2.05199	0
mmu-miR-1298-3p	MIMAT0014810	0.488292	0.0432568	-3.72061	1	0	58	70	0	48	10	52	4	38	1.82463	0	3.85151	3.83279	0	4.58333	2.74456	4.28296	3.05199	4.32379
mmu-miR-6966-5p	MIMAT0027834	0.488706	0.0437927	-7.44468	6	9	1049	10911	5	685	4573	4681	47	1519	4.4096	4.93823	8.02833	11.117	4.05216	8.41833	11.5816	10.7751	6.60657	9.64477
mmu-miR-7028-3p	MIMAT0027961	0.488706	0.0445188	-3.92378	0	0	70	79	0	29	15	35	5	25	0	0	4.12281	4.00728	0	3.85635	3.32952	3.71181	3.37391	3.71972
mmu-miR-6974-5p	MIMAT0027850	0.489281	0.0454206	-3.01415	1	1	38	77	2	11	65	139	7	31	1.82463	1.7683	3.24146	3.97029	2.73024	2.4578	5.445	5.70147	3.85934	4.03006
mmu_piR_003704/gb/DQ550610/Mus_musculus:19:3359243:3359268:Plus	GenBank:DQ550610	0.490363	0.0461755	-3.20222	0	0	0	0	0	3	18	4	6	0	0	0	0	0	0	0.58333	3.59256	0.582525	3.63695	0
mmu-miR-6925-5p	MIMAT0027750	0.496595	0.0472706	-2.24028	2	2	22	38	1	29	17	45	9	14	2.82463	2.7683	2.45296	2.95143	1.73024	3.85635	3.5101	4.07438	4.22191	2.88322
mmu_piR_026693/gb/DQ710583/Mus_musculus:17:27023070:27023095:Minus	GenBank:DQ710583	0.496595	0.047055	-7.46149	0	8	371	3455	4	364	441	1087	29	784	0	4.7683	6.5288	9.45797	3.73024	7.50616	8.20727	8.66866	5.90997	8.69057
mmu-miR-411-5p	MIMAT0004747	0.513038	0.0503665	-3.05747	0	0	0	0	0	5	11	1	7	0	0	0	0	0	0	1.3203	2.88207	0	3.85934	0
mmu-miR-451a	MIMAT0001632	0.513038	0.0504111	-2.54912	0	2	23	22	2	22	17	21	4	29	0	2.7683	2.51709	2.16293	2.73024	3.4578	3.5101	2.97484	3.05199	3.93385
mmu-miR-882	MIMAT0004847	0.513038	0.0496781	-3.43767	6	1	46	36	0	102	29	30	4	60	4.4096	1.7683	3.51709	2.87343	0	5.67079	4.28062	3.48942	3.05199	4.98275
mmu-miR-1930-3p	MIMAT0017340	0.515632	0.0566463	-2.56624	2	1	17	14	6	26	22	42	14	14	2.82463	1.7683	2.08099	1.51086	4.3152	3.69881	3.88207	3.97484	4.85934	2.88322
mmu-miR-3475-5p	MIMAT0026642	0.515632	0.0565384	-3.471	4	5	106	35	0	62	19	199	8	89	3.82463	4.09023	4.72145	2.83279	0	4.95256	3.67056	6.21915	4.05199	5.5516
mmu-miR-5620-3p	MIMAT0022368	0.515632	0.0542025	-3.45274	1	2	41	186	0	28	52	90	5	51	1.82463	2.7683	3.35108	5.24266	0	3.80572	5.12307	5.07438	3.37391	4.74829
mmu-miR-6930-3p	MIMAT0027761	0.515632	0.0531487	-3.5082	0	1	90	39	0	43	9	27	5	45	0	1.7683	4.48538	2.9889	0	4.42463	2.59256	3.33741	3.37391	4.56772
mmu-miR-7000-5p	MIMAT0027902	0.515632	0.0557379	-3.51339	2	0	54	81	0	62	11	45	5	40	2.82463	0	3.74842	4.04335	0	4.95256	2.88207	4.07438	3.37391	4.39779
mmu-miR-7020-3p	MIMAT0027945	0.515632	0.054147	-3.23078	0	7	98	61	3	77	51	93	11	46	0	4.57566	4.60824	3.63424	3.3152	5.26515	5.09506	5.12168	4.51142	4.59943
mmu-miR-7029-3p	MIMAT0027963	0.515632	0.0531829	-3.50924	0	0	39	44	3	52	21	28	2	55	0	0	3.27893	3.16293	3.3152	4.69881	3.81495	3.38988	2.05199	4.85722
mmu-miR-7039-5p	MIMAT0027982	0.515632	0.0574983	-2.47335	1	1	39	47	5	30	17	110	8	28	1.82463	1.7683	3.27893	3.25809	4.05216	3.90526	3.5101	5.36388	4.05199	3.88322
mmu-miR-7048-3p	MIMAT0028001	0.515632	0.0537123	-3.38173	1	1	353	51	3	46	37	66	30	105	1.82463	1.7683	6.45705	3.37593	3.3152	4.52193	4.63209	4.62692	5.95888	5.79011
mmu-miR-7061-3p	MIMAT0028027	0.515632	0.0537315	-2.84447	0	0	14	9	0	5	9	25	0	16	0	0	1.80088	0.873428	0	1.3203	2.59256	3.22638	0	3.07586
mmu-miR-7075-5p	MIMAT0028056	0.515632	0.0529914	-3.04313	2	1	56	63	0	17	49	47	10	21	2.82463	1.7683	3.80088	3.68078	0	3.08583	5.03734	4.13711	4.37391	3.46818
mmu-miR-7224-5p	MIMAT0028416	0.515632	0.0560476	-2.93314	0	1	32	37	0	12	25	36	2	15	0	1.7683	2.99353	2.91296	0	2.58333	4.06649	3.75245	2.05199	2.98276
mmu-miR-7234-3p	MIMAT0028437	0.515632	0.057527	-2.38976	0	0	0	0	0	3	10	5	2	0	0	0	0	0	0	0.58333	2.74456	0.904453	2.05199	0
mmu-miR-8092	MIMAT0031393	0.515632	0.0569892	-2.87299	3	4	100	322	4	216	36	433	11	121	3.4096	3.7683	4.63739	6.03442	3.73024	6.75325	4.59256	7.34075	4.51142	5.99473
mmu_piR_003861/gb/DQ551040/Mus_musculus:1:72170283:72170312:Plus	GenBank:DQ551040	0.515632	0.0562525	-3.01669	0	0	0	0	0	4	18	0	5	0	0	0	0	0	0	0.998367	3.59256	0	3.37391	0
mmu_piR_038853/gb/piRNA_2086/Mus_musculus:2:92347206:92347226:Plus	GenBank:piRNA_2086	0.515632	0.0566596	-2.60644	0	0	0	0	0	15	4	16	0	0	0	0	0	0	0	2.90526	1.42263	2.58252	0	0
mmu-miR-7659-5p	MIMAT0029824	0.525503	0.0592196	-3.77823	2	6	166	493	1	147	264	217	7	190	2.82463	4.35326	5.36857	6.64895	1.73024	6.19804	7.46703	6.34408	3.85934	6.64572
mmu_piR_000691/gb/DQ541218/Mus_musculus:8:126446977:126447002:Minus	GenBank:DQ541218	0.525503	0.059704	-2.56504	0	0	0	0	0	10	4	0	4	0	0	0	0	0	0	2.3203	1.42263	0	3.05199	0
mmu-miR-5128	MIMAT0020639	0.527304	0.0607662	-3.79318	0	2	37	324	3	113	44	214	6	37	0	2.7683	3.20298	6.04335	3.3152	5.81855	4.88207	6.32399	3.63695	4.28532
mmu-miR-7077-3p	MIMAT0028061	0.527304	0.060204	-4.31507	0	0	50	259	1	66	8	91	9	55	0	0	3.63738	5.72031	1.73024	5.04276	2.42263	5.09032	4.22191	4.85722
mmu-miR-879-5p	MIMAT0004842	0.529556	0.0617905	-3.6537	0	0	45	103	3	57	15	130	5	20	0	0	3.48538	4.39	3.3152	4.83126	3.32952	5.60489	3.37391	3.39779
mmu-miR-504-5p	MIMAT0004889	0.530378	0.0622678	-3.70032	0	0	79	110	2	32	28	118	4	35	0	0	4.29731	4.48486	2.73024	3.99837	4.22999	5.46517	3.05199	4.20515
mmu-miR-5132-5p	MIMAT0020643	0.530378	0.0627008	-4.7925	2	24	448	3829	17	412	2122	2257	31	857	2.82463	6.35326	6.80088	9.60626	5.8177	7.68487	10.4738	9.72272	6.00618	8.81902
mmu-let-7e-3p	MIMAT0017016	0.539208	0.0645725	-3.07408	1	5	26	86	0	24	61	40	13	18	1.82463	4.09023	2.69397	4.12977	0	3.58333	5.35337	3.90445	4.75242	3.24579
mmu-miR-127-5p	MIMAT0004530	0.543542	0.0662041	-2.96976	0	0	32	43	2	13	8	67	7	16	0	0	2.99353	3.12977	2.73024	2.69881	2.42263	4.64861	3.85934	3.07586
mmu-miR-219b-3p	MIMAT0029807	0.546505	0.0668448	-2.62618	0	0	0	0	0	20	3	1	3	0	0	0	0	0	0	3.3203	1.0076	0	2.63695	0
mmu-miR-684	MIMAT0003462	0.546747	0.0673653	-3.54429	7	10	761	1804	5	757	168	1893	39	424	4.63199	5.09023	7.56528	8.52049	4.05216	8.56252	6.81495	9.46898	6.33739	7.80379
mmu_piR_000858/gb/DQ541610/Mus_musculus:19:6181309:6181337:Plus	GenBank:DQ541610	0.546747	0.0679386	-2.56504	0	0	0	0	0	4	10	2	4	0	0	0	0	0	0	0.998367	2.74456	0	3.05199	0
mmu-miR-3061-3p	MIMAT0014829	0.556169	0.0700047	-5.27942	0	8	199	644	5	110	683	572	6	341	0	4.7683	5.63015	7.03442	4.05216	5.77973	8.83838	7.7424	3.63695	7.48949
mmu-miR-6991-5p	MIMAT0027884	0.556169	0.0706017	-2.76365	1	0	45	42	3	25	10	25	12	53	1.82463	0	3.48538	3.09582	3.3152	3.64222	2.74456	3.22638	4.63695	4.80379
mmu-miR-7044-3p	MIMAT0027993	0.556169	0.0712795	-2.98735	0	4	64	89	4	42	45	149	14	23	0	3.7683	3.99353	4.17924	3.73024	4.39068	4.91449	5.80169	4.85934	3.59943
mmu-miR-7078-5p	MIMAT0028062	0.556169	0.0716613	-5.27398	6	1	312	969	10	152	2349	1042	7	421	4.4096	1.7683	6.27893	7.62386	5.05216	6.24629	10.6205	8.60766	3.85934	7.79354
mmu_piR_000691/gb/DQ541218/Mus_musculus:16:32921744:32921769:Plus	GenBank:DQ541218	0.556169	0.0710189	-2.37985	0	0	0	0	0	5	11	0	2	0	0	0	0	0	0	1.3203	2.88207	0	2.05199	0
mmu-miR-6975-5p	MIMAT0027852	0.557581	0.0721945	-2.50584	8	1	49	95	2	25	42	143	11	66	4.82463	1.7683	3.60824	4.27336	2.73024	3.64222	4.81495	5.7424	4.51142	5.12026
mmu-miR-1197-3p	MIMAT0005858	0.564378	0.0733634	-2.46447	0	0	11	8	0	13	3	10	4	0	0	0	1.45296	0.703503	0	2.69881	1.0076	1.90445	3.05199	0
mmu-miR-1955-5p	MIMAT0009426	0.564817	0.0745958	-3.01719	3	1	90	122	0	59	35	53	12	28	3.4096	1.7683	4.48538	4.63424	0	4.88101	4.55192	4.31045	4.63695	3.88322
mmu-miR-3076-3p	MIMAT0014861	0.564817	0.0757329	-2.07068	1	1	33	13	1	14	16	15	6	12	1.82463	1.7683	3.03792	1.40394	1.73024	2.80572	3.42263	2.48942	3.63695	2.66083
mmu-miR-6971-5p	MIMAT0027844	0.564817	0.0742231	-2.72028	0	5	49	42	2	51	17	31	9	53	0	4.09023	3.60824	3.09582	2.73024	4.67079	3.5101	3.53672	4.22191	4.80379
mmu-miR-6990-3p	MIMAT0027883	0.564817	0.0743198	-2.27842	0	0	0	0	0	5	7	14	0	0	0	0	0	0	0	1.3203	2.22999	2.38988	0	0
mmu-miR-184-5p	MIMAT0022690	0.567766	0.0764188	-2.73778	2	3	70	46	0	35	60	26	9	27	2.82463	3.35326	4.12281	3.22706	0	4.12765	5.32953	3.28296	4.22191	3.83075
mmu-miR-7093-3p	MIMAT0028093	0.569954	0.077005	-2.3752	0	1	45	22	1	24	9	23	3	21	0	1.7683	3.48538	2.16293	1.73024	3.58333	2.59256	3.10609	2.63695	3.46818
mmu-miR-452-3p	MIMAT0017194	0.57975	0.078922	-3.30229	0	3	48	28	0	15	11	14	32	27	0	3.35326	3.57849	2.51086	0	2.90526	2.88207	2.38988	6.05199	3.83075
mmu-miR-1897-5p	MIMAT0007864	0.582623	0.0830053	-2.20742	4	11	48	39	6	39	86	104	10	110	3.82463	5.22773	3.57849	2.9889	4.3152	4.28377	5.8489	5.28296	4.37391	5.85722
mmu-miR-210-3p	MIMAT0000658	0.582623	0.0817711	-2.54437	0	0	16	33	3	18	16	18	4	10	0	0	1.99353	2.7479	3.3152	3.16829	3.42263	2.75245	3.05199	2.39779
mmu-miR-216a-5p	MIMAT0000662	0.582623	0.082897	-2.72884	3	6	195	203	3	134	21	626	20	136	3.4096	4.35326	5.60086	5.36884	3.3152	6.06446	3.81495	7.87254	5.37391	6.16333
mmu-miR-3103-3p	MIMAT0014938	0.582623	0.0835916	-3.70811	1	2	301	896	2	157	86	394	13	162	1.82463	2.7683	6.22715	7.51086	2.73024	6.29299	5.8489	7.20458	4.75242	6.41571
mmu-miR-6381	MIMAT0025127	0.582623	0.0844762	-2.20207	0	1	19	7	1	8	5	12	5	12	0	1.7683	2.24146	0.510857	1.73024	1.99837	1.74456	2.16749	3.37391	2.66083
mmu-miR-6896-5p	MIMAT0027692	0.582623	0.0846801	-2.16935	1	1	38	42	5	34	16	58	9	20	1.82463	1.7683	3.24146	3.09582	4.05216	4.08583	3.42263	4.44051	4.22191	3.39779
mmu-miR-6956-3p	MIMAT0027813	0.582623	0.0840756	-3.43523	2	0	143	79	1	120	8	40	12	102	2.82463	0	5.1534	4.00728	1.73024	5.90526	2.42263	3.90445	4.63695	5.74829
mmu-miR-7040-5p	MIMAT0027984	0.582623	0.0800288	-4.63573	0	8	238	298	0	146	41	261	14	70	0	4.7683	5.88835	5.92267	0	6.18819	4.78019	6.61043	4.85934	5.20515
mmu-miR-743a-5p	MIMAT0017263	0.582623	0.0843508	-2.39343	0	1	32	15	0	10	6	18	2	22	0	1.7683	2.99353	1.61039	0	2.3203	2.0076	2.75245	2.05199	3.5353
mmu_piR_003770/gb/DQ550765/Mus_musculus:15:82977530:82977560:Plus	GenBank:DQ550765	0.582623	0.0846622	-3.36826	0	0	0	0	0	2	24	0	13	0	0	0	0	0	0	0	4.0076	0	4.75242	0
mmu-miR-450b-5p	MIMAT0003511	0.584048	0.0851861	-2.21599	0	0	0	0	0	11	7	2	1	0	0	0	0	0	0	2.4578	2.22999	0	1.05199	0
mmu-miR-7667-5p	MIMAT0029840	0.586617	0.0858611	-2.44749	3	2	44	75	1	52	8	160	9	43	3.4096	2.7683	3.45296	3.93232	1.73024	4.69881	2.42263	5.90445	4.22191	4.50213
mmu-miR-1898	MIMAT0007875	0.587878	0.0895093	-3.63052	1	1	61	507	0	38	32	173	9	46	1.82463	1.7683	3.92427	6.68934	0	4.24629	4.42263	6.01715	4.22191	4.59943
mmu-miR-294-5p	MIMAT0004574	0.587878	0.0883533	-3.19612	1	6	93	38	0	11	80	40	23	39	1.82463	4.35326	4.53269	2.95143	0	2.4578	5.74456	3.90445	5.57555	4.36127
mmu-miR-299b-5p	MIMAT0022836	0.587878	0.0870256	-2.45955	0	2	13	16	0	9	3	23	4	19	0	2.7683	1.69397	1.7035	0	2.16829	1.0076	3.10609	3.05199	3.32379
mmu-miR-325-3p	MIMAT0004640	0.587878	0.0884742	-2.24567	6	1	79	101	6	52	41	149	17	45	4.4096	1.7683	4.29731	4.36171	4.3152	4.69881	4.78019	5.80169	5.13945	4.56772
mmu-miR-6897-3p	MIMAT0027695	0.587878	0.089656	-2.37184	2	3	21	32	0	36	23	34	3	16	2.82463	3.35326	2.38585	2.7035	0	4.16829	3.9462	3.66999	2.63695	3.07586
mmu_piR_017483/gb/DQ697113/Mus_musculus:16:18417901:18417929:Plus	GenBank:DQ697113	0.587878	0.0887841	-2.53886	0	0	0	0	0	19	2	1	4	0	0	0	0	0	0	3.24629	0.422635	0	3.05199	0
mmu-miR-17-3p	MIMAT0000650	0.604975	0.0939417	-2.70464	4	0	67	87	1	25	35	65	6	43	3.82463	0	4.05962	4.14645	1.73024	3.64222	4.55192	4.60489	3.63695	4.50213
mmu-miR-1938	MIMAT0009402	0.604975	0.0941379	-2.45983	0	1	51	40	3	28	20	49	3	28	0	1.7683	3.66595	3.02543	3.3152	3.80572	3.74456	4.19723	2.63695	3.88322
mmu-miR-7663-5p	MIMAT0029832	0.604975	0.0930631	-2.47324	3	1	41	10	0	14	11	22	10	15	3.4096	1.7683	3.35108	1.02543	0	2.80572	2.88207	3.04196	4.37391	2.98276
mmu-miR-7678-5p	MIMAT0029870	0.604975	0.0944306	-2.58023	0	0	47	29	2	15	7	27	5	27	0	0	3.54812	2.56148	2.73024	2.90526	2.22999	3.33741	3.37391	3.83075
mmu_piR_000858/gb/DQ541610/Mus_musculus:19:34984013:34984041:Minus	GenBank:DQ541610	0.604975	0.0931781	-2.33022	0	0	0	0	0	3	11	2	3	0	0	0	0	0	0	0.58333	2.88207	0	2.63695	0
mmu-miR-7043-5p	MIMAT0027990	0.610943	0.0956748	-2.03716	0	0	0	0	0	7	4	10	0	0	0	0	0	0	0	1.80572	1.42263	1.90445	0	0
mmu-miR-6904-3p	MIMAT0027709	0.610964	0.0971605	-4.51589	1	8	429	676	0	305	93	473	10	145	1.82463	4.7683	6.73836	7.10438	0	7.25103	5.96179	7.46822	4.37391	6.25577
mmu-miR-7023-3p	MIMAT0027951	0.610964	0.0963997	-2.22004	0	1	26	11	0	6	5	18	3	12	0	1.7683	2.69397	1.16293	0	1.58333	1.74456	2.75245	2.63695	2.66083
mmu-miR-1966-5p	MIMAT0009439	0.614201	0.103536	-2.66785	6	0	63	62	2	54	13	109	8	45	4.4096	0	3.97081	3.6577	2.73024	4.75325	3.12307	5.35071	4.05199	4.56772
mmu-miR-298-3p	MIMAT0017007	0.614201	0.106066	-3.23409	4	5	286	1521	10	57	476	1870	43	209	3.82463	4.09023	6.1534	8.27431	5.05216	4.83126	8.31745	9.45135	6.47825	6.78322
mmu-miR-3112-5p	MIMAT0014955	0.614201	0.106647	-2.1554	0	0	0	0	0	10	1	4	3	0	0	0	0	0	0	2.3203	0	0.582525	2.63695	0
mmu-miR-3473f	MIMAT0031390	0.614201	0.107452	-2.3414	1	0	26	11	4	13	24	17	6	11	1.82463	0	2.69397	1.16293	3.73024	2.69881	4.0076	2.66999	3.63695	2.5353
mmu-miR-5623-5p	MIMAT0022373	0.614201	0.108091	-2.26583	2	2	255	111	2	49	44	89	18	58	2.82463	2.7683	5.98788	4.49792	2.73024	4.61308	4.88207	5.05826	5.22191	4.93384
mmu-miR-6339	MIMAT0025082	0.614201	0.101252	-2.49538	1	3	54	32	0	18	18	18	16	24	1.82463	3.35326	3.74842	2.7035	0	3.16829	3.59256	2.75245	5.05199	3.66083
mmu-miR-6396	MIMAT0025147	0.614201	0.0998351	-2.32486	0	0	20	26	0	9	12	11	1	11	0	0	2.31546	2.40394	0	2.16829	3.0076	2.04196	1.05199	2.5353
mmu-miR-6969-5p	MIMAT0027840	0.614201	0.10665	-2.48534	0	1	41	66	1	18	18	36	2	46	0	1.7683	3.35108	3.7479	1.73024	3.16829	3.59256	3.75245	2.05199	4.59943
mmu-miR-6992-5p	MIMAT0027886	0.614201	0.0998411	-2.20742	2	1	98	74	3	69	15	80	8	51	2.82463	1.7683	4.60824	3.91296	3.3152	5.10689	3.32952	4.90445	4.05199	4.74829
mmu-miR-743b-5p	MIMAT0004839	0.614201	0.106104	-2.72639	0	1	12	70	0	31	7	49	1	15	0	1.7683	1.57849	3.83279	0	3.95256	2.22999	4.19723	1.05199	2.98276
mmu_piR_000216/gb/DQ540053/Mus_musculus:16:11057584:11057612:Plus	GenBank:DQ540053	0.614201	0.10814	-2.17415	0	0	0	0	0	5	14	0	1	0	0	0	0	0	0	1.3203	3.22999	0	1.05199	0
mmu_piR_000219/gb/DQ540058/Mus_musculus:17:39455665:39455691:Plus	GenBank:DQ540058	0.614201	0.104508	-2.68799	1	0	25	15	0	11	19	3	10	11	1.82463	0	2.63738	1.61039	0	2.4578	3.67056	0.167487	4.37391	2.5353
mmu_piR_000858/gb/DQ541610/Mus_musculus:10:127469713:127469741:Plus	GenBank:DQ541610	0.614201	0.104771	-2.72433	0	0	0	0	0	1	12	0	9	0	0	0	0	0	0	0	3.0076	0	4.22191	0
mmu_piR_004265/gb/DQ552333/Mus_musculus:11:103253603:103253633:Plus	GenBank:DQ552333	0.614201	0.105309	-3.27753	0	0	8	64	0	16	5	118	4	0	0	0	0.993529	3.7035	0	2.99837	1.74456	5.46517	3.05199	0
mmu-miR-6397	MIMAT0025149	0.614711	0.108848	-2.34989	2	0	28	23	0	21	5	16	4	18	2.82463	0	2.80088	2.22706	0	3.39068	1.74456	2.58252	3.05199	3.24579
mmu-miR-8115	MIMAT0031421	0.614882	0.109223	-2.471	0	0	41	40	1	23	16	12	2	21	0	0	3.35108	3.02543	1.73024	3.52193	3.42263	2.16749	2.05199	3.46818
mmu_piR_003861/gb/DQ551040/Mus_musculus:11:101443585:101443614:Plus	GenBank:DQ551040	0.614882	0.109508	-2.14217	0	0	0	0	0	5	13	0	1	0	0	0	0	0	0	1.3203	3.12307	0	1.05199	0
mmu-miR-344c-3p	MIMAT0014928	0.618146	0.110722	-2.41321	0	2	72	49	2	40	42	25	5	23	0	2.7683	4.16345	3.31821	2.73024	4.3203	4.81495	3.22638	3.37391	3.59943
mmu-miR-3473e	MIMAT0025587	0.624164	0.112831	-2.04742	4	8	39	37	1	43	27	47	11	41	3.82463	4.7683	3.27893	2.91296	1.73024	4.42463	4.17752	4.13711	4.51142	4.43342
mmu-miR-6345	MIMAT0025088	0.624164	0.113078	-2.96254	5	6	104	126	0	209	39	126	5	78	4.14656	4.35326	4.69397	4.68078	0	6.70573	4.70804	5.5598	3.37391	5.36127
mmu_piR_003861/gb/DQ551040/Mus_musculus:11:101461862:101461891:Minus	GenBank:DQ551040	0.624164	0.112448	-2.46126	0	0	0	0	0	2	13	0	5	0	0	0	0	0	0	0	3.12307	0	3.37391	0
mmu-miR-770-3p	MIMAT0003891	0.62546	0.11375	-2.17389	11	5	439	85	4	118	100	126	19	209	5.28407	4.09023	6.77161	4.11289	3.73024	5.88101	6.06649	5.5598	5.29991	6.78322
mmu_piR_000691/gb/DQ541218/Mus_musculus:8:126428267:126428292:Minus	GenBank:DQ541218	0.62546	0.113953	-2.01613	0	0	0	0	0	12	4	0	1	0	0	0	0	0	0	2.58333	1.42263	0	1.05199	0
mmu-miR-204-3p	MIMAT0017002	0.629163	0.115322	-2.37387	0	2	48	27	2	28	8	16	12	38	0	2.7683	3.57849	2.45839	2.73024	3.80572	2.42263	2.58252	4.63695	4.32379
mmu-miR-3075-3p	MIMAT0014859	0.629163	0.116335	-2.07088	1	0	25	24	2	14	13	14	6	13	1.82463	0	2.63738	2.28846	2.73024	2.80572	3.12307	2.38988	3.63695	2.7763
mmu-miR-363-3p	MIMAT0000708	0.629163	0.116693	-3.37797	0	3	31	285	0	26	29	203	6	16	0	3.35326	2.94772	5.85832	0	3.69881	4.28062	6.24786	3.63695	3.07586
mmu-miR-6951-3p	MIMAT0027803	0.629163	0.11728	-2.11514	0	0	0	0	0	12	2	2	0	10	0	0	0	0	0	2.58333	0.422635	0	0	2.39779
mmu-miR-6970-3p	MIMAT0027843	0.629163	0.11659	-2.22852	0	0	13	12	0	8	11	19	1	0	0	0	1.69397	1.28847	0	1.99837	2.88207	2.83045	1.05199	0
mmu-miR-7094b-2-5p	MIMAT0028096	0.629163	0.11597	-2.5595	1	2	38	89	0	62	8	76	4	22	1.82463	2.7683	3.24146	4.17924	0	4.95256	2.42263	4.83045	3.05199	3.5353
mmu-miR-7214-3p	MIMAT0028397	0.629163	0.117525	-4.43492	4	0	106	898	0	76	131	351	5	49	3.82463	0	4.72145	7.51407	0	5.24629	6.45606	7.03785	3.37391	4.69057
mmu-miR-8097	MIMAT0031399	0.629163	0.117293	-2.64823	0	3	70	167	3	41	21	130	8	64	0	3.35326	4.12281	5.08721	3.3152	4.35592	3.81495	5.60489	4.05199	5.07586
mmu_piR_000620/gb/DQ540981/Mus_musculus:3:5843782:5843811:Plus	GenBank:DQ540981	0.629163	0.116316	-2.95311	54	486	1592	1909	61	730	6999	839	2795	1351	7.57952	10.6931	8.63015	8.6021	7.66097	8.51012	12.1956	8.29505	12.5006	9.47568
mmu-miR-216a-3p	MIMAT0017054	0.631987	0.118376	-2.10815	0	0	0	0	0	10	2	1	3	0	0	0	0	0	0	2.3203	0.422635	0	2.63695	0
mmu-miR-8112	MIMAT0031418	0.643077	0.121441	-2.44144	5	12	114	431	8	71	724	356	24	69	4.14656	5.35326	4.82642	6.45505	4.73024	5.14811	8.92248	7.05826	5.63695	5.18439
mmu-miR-6903-3p	MIMAT0027707	0.643782	0.122233	-2.19969	0	0	0	0	0	1	11	3	3	0	0	0	0	0	0	0	2.88207	0.167487	2.63695	0
mmu-miR-28b	MIMAT0019354	0.645303	0.122852	-2.15279	1	0	13	7	0	11	1	14	2	12	1.82463	0	1.69397	0.510857	0	2.4578	0	2.38988	2.05199	2.66083
mmu-miR-7058-5p	MIMAT0028020	0.652552	0.124566	-2.45266	0	4	46	80	3	79	15	56	13	19	0	3.7683	3.51709	4.02543	3.3152	5.30215	3.32952	4.38988	4.75242	3.32379
mmu-miR-497b	MIMAT0031404	0.653204	0.125693	-2.78541	0	1	95	151	4	30	33	32	10	127	0	1.7683	4.56338	4.94191	3.73024	3.90526	4.46703	3.58252	4.37391	6.06455
mmu-miR-7082-3p	MIMAT0028071	0.653204	0.125219	-2.9557	0	13	195	238	5	69	114	118	21	146	0	5.46874	5.60086	5.59832	4.05216	5.10689	6.25552	5.46517	5.4443	6.26569
mmu-miR-6901-5p	MIMAT0027702	0.656409	0.126646	-2.87076	0	2	60	279	1	46	18	157	6	35	0	2.7683	3.90042	5.82762	1.73024	4.52193	3.59256	5.87715	3.63695	4.20515
mmu-miR-3473g	MIMAT0031427	0.662022	0.1285	-2.94857	0	1	160	236	2	25	52	119	13	35	0	1.7683	5.31546	5.58615	2.73024	3.64222	5.12307	5.47734	4.75242	4.20515
mmu-miR-5107-5p	MIMAT0020615	0.666437	0.130748	-2.85212	3	3	185	164	0	155	21	94	8	94	3.4096	3.35326	5.52491	5.06105	0	6.27449	3.81495	5.13711	4.05199	5.63045
mmu-miR-654-3p	MIMAT0004898	0.666437	0.130954	-2.10571	6	3	31	254	5	94	64	172	6	70	4.4096	3.35326	2.94772	5.69219	4.05216	5.55296	5.42263	6.00879	3.63695	5.20515
mmu-miR-193b-5p	MIMAT0017271	0.668347	0.131762	-2.48597	0	3	105	97	3	59	63	51	6	32	0	3.35326	4.70777	4.30342	3.3152	4.88101	5.39991	4.25495	3.63695	4.07586
mmu-miR-483-5p	MIMAT0004782	0.668347	0.132665	-3.28771	2	8	507	1967	2	192	279	949	19	188	2.82463	4.7683	6.97937	8.64528	2.73024	6.58333	7.54676	8.47279	5.29991	6.63045
mmu-miR-7050-3p	MIMAT0028005	0.668347	0.132712	-2.47071	0	4	45	25	2	8	34	91	10	14	0	3.7683	3.48538	2.34736	2.73024	1.99837	4.5101	5.09032	4.37391	2.88322
mmu-miR-6976-5p	MIMAT0027854	0.671005	0.133926	-2.77051	0	1	187	76	5	91	17	36	13	67	0	1.7683	5.54042	3.95143	4.05216	5.50616	3.5101	3.75245	4.75242	5.14195
mmu-miR-3109-3p	MIMAT0014950	0.672907	0.135482	-2.02749	9	3	70	190	6	181	31	224	10	87	4.99456	3.35326	4.12281	5.27336	4.3152	6.49821	4.37683	6.38988	4.37391	5.51881
mmu-miR-3473d	MIMAT0020632	0.672907	0.135294	-2.21943	2	11	305	352	4	104	95	326	20	117	2.82463	5.22773	6.24619	6.16293	3.73024	5.69881	5.99249	6.93125	5.37391	5.94623
mmu-miR-1981-3p	MIMAT0017351	0.681043	0.140179	-2.26576	0	1	27	96	3	22	22	59	4	17	0	1.7683	2.74842	4.28847	3.3152	3.4578	3.88207	4.46517	3.05199	3.16333
mmu-miR-7000-3p	MIMAT0027903	0.681043	0.139253	-3.37459	4	0	84	538	5	30	360	316	14	36	3.82463	0	4.38585	6.77496	4.05216	3.90526	7.91449	6.88631	4.85934	4.24579
mmu-miR-7031-3p	MIMAT0027967	0.681043	0.140607	-2.51671	0	0	45	16	0	15	7	27	5	0	0	0	3.48538	1.7035	0	2.90526	2.22999	3.33741	3.37391	0
mmu_piR_000858/gb/DQ541610/Mus_musculus:4:52434867:52434895:Minus	GenBank:DQ541610	0.681043	0.140448	-2.10862	0	0	0	0	0	2	10	1	3	0	0	0	0	0	0	0	2.74456	0	2.63695	0
mmu-miR-295-3p	MIMAT0000373	0.68125	0.141897	-3.12966	1	2	225	1095	6	147	50	877	12	170	1.82463	2.7683	5.80731	7.80022	4.3152	6.19804	5.06649	8.35896	4.63695	6.48526
mmu-miR-6923-3p	MIMAT0027747	0.68125	0.141922	-2.00088	2	8	107	209	9	56	143	199	16	60	2.82463	4.7683	4.735	5.41086	4.90016	4.80572	6.58251	6.21915	5.05199	4.98275
mmu-miR-6919-3p	MIMAT0027739	0.686756	0.144762	-2.16771	0	0	21	15	0	7	7	20	3	0	0	0	2.38585	1.61039	0	1.80572	2.22999	2.90445	2.63695	0
mmu-miR-3473c	MIMAT0020614	0.687655	0.146809	-3.01758	1	9	249	228	0	172	30	127	13	67	1.82463	4.93823	5.95353	5.53639	0	6.42463	4.32953	5.57121	4.75242	5.14195
mmu-miR-6356	MIMAT0025099	0.687655	0.146253	-2.50219	3	33	498	1679	7	188	412	313	77	451	3.4096	6.81269	6.95353	8.41689	4.53759	6.55296	8.10914	6.87254	7.31877	7.89285
mmu-miR-6943-3p	MIMAT0027787	0.687655	0.146859	-2.22933	0	2	53	35	4	17	38	23	5	46	0	2.7683	3.72145	2.83279	3.73024	3.08583	4.67056	3.10609	3.37391	4.59943
mmu-miR-7074-3p	MIMAT0028055	0.687655	0.148096	-2.40115	0	3	69	95	1	74	16	21	8	33	0	3.35326	4.10205	4.27336	1.73024	5.20782	3.42263	2.97484	4.05199	4.12026
mmu-miR-219a-5p	MIMAT0000664	0.689037	0.148809	-2.23068	1	1	19	211	1	25	16	82	4	25	1.82463	1.7683	2.24146	5.4246	1.73024	3.64222	3.42263	4.94008	3.05199	3.71972
mmu-miR-1188-5p	MIMAT0005843	0.689188	0.15421	-2.45751	5	9	585	1804	16	716	145	1232	34	232	4.14656	4.93823	7.18582	8.52049	5.73024	8.48218	6.60254	8.84931	6.13945	6.93384
mmu-miR-1264-3p	MIMAT0014803	0.689188	0.152189	-2.01401	0	0	0	0	0	11	9	2	0	0	0	0	0	0	0	2.4578	2.59256	0	0	0
mmu-miR-1956	MIMAT0009428	0.689188	0.15842	-2.46623	7	4	74	208	0	38	60	125	14	44	4.63199	3.7683	4.20298	5.40394	0	4.24629	5.32953	5.54831	4.85934	4.5353
mmu-miR-1960	MIMAT0009433	0.689188	0.157247	-2.49281	0	0	67	111	2	18	15	31	6	35	0	0	4.05962	4.49792	2.73024	3.16829	3.32952	3.53672	3.63695	4.20515
mmu-miR-3072-5p	MIMAT0014852	0.689188	0.1509	-2.51903	4	1	75	197	0	34	29	36	13	58	3.82463	1.7683	4.22235	5.32555	0	4.08583	4.28062	3.75245	4.75242	4.93384
mmu-miR-344-3p	MIMAT0000593	0.689188	0.159533	-2.50726	5	0	39	40	0	34	8	49	2	38	4.14656	0	3.27893	3.02543	0	4.08583	2.42263	4.19723	2.05199	4.32379
mmu-miR-5103	MIMAT0020610	0.689188	0.156139	-2.37439	4	1	119	55	1	24	46	241	10	11	3.82463	1.7683	4.88835	3.48486	1.73024	3.58333	4.9462	6.49541	4.37391	2.5353
mmu-miR-6399	MIMAT0025151	0.689188	0.155315	-2.3944	0	1	70	75	0	20	10	31	4	21	0	1.7683	4.12281	3.93232	0	3.3203	2.74456	3.53672	3.05199	3.46818
mmu-miR-6540-3p	MIMAT0025586	0.689188	0.152927	-2.12284	0	4	31	40	1	24	9	23	9	20	0	3.7683	2.94772	3.02543	1.73024	3.58333	2.59256	3.10609	4.22191	3.39779
mmu-miR-6924-3p	MIMAT0027749	0.689188	0.155532	-2.78595	8	5	205	191	0	107	52	324	7	93	4.82463	4.09023	5.67301	5.28093	0	5.73983	5.12307	6.92237	3.85934	5.61502
mmu-miR-6979-3p	MIMAT0027861	0.689188	0.155133	-2.22639	4	20	245	302	3	70	114	350	14	368	3.82463	6.09023	5.93017	5.94191	3.3152	5.12765	6.25552	7.03374	4.85934	7.59943
mmu-miR-7034-5p	MIMAT0027972	0.689188	0.158327	-2.19387	7	26	106	495	5	96	210	913	21	93	4.63199	6.46874	4.72145	6.65479	4.05216	5.58333	7.13688	8.417	5.4443	5.61502
mmu-miR-717	MIMAT0003510	0.689188	0.154778	-2.86768	0	0	77	257	1	24	19	82	6	21	0	0	4.26032	5.70913	1.73024	3.58333	3.67056	4.94008	3.63695	3.46818
mmu-miR-7686-5p	MIMAT0029898	0.689188	0.15684	-2.04507	3	0	16	24	3	16	10	30	8	14	3.4096	0	1.99353	2.28846	3.3152	2.99837	2.74456	3.48942	4.05199	2.88322
mmu-miR-7687-5p	MIMAT0029902	0.689188	0.156173	-2.43342	0	0	53	67	0	14	11	28	2	13	0	0	3.72145	3.76959	0	2.80572	2.88207	3.38988	2.05199	2.7763
mmu-miR-6963-3p	MIMAT0027827	0.690654	0.160469	-2.12715	3	3	27	22	0	33	7	60	5	15	3.4096	3.35326	2.74842	2.16293	0	4.04276	2.22999	4.48942	3.37391	2.98276
mmu-miR-540-3p	MIMAT0003167	0.691311	0.161329	-2.29864	2	9	256	713	6	306	96	443	16	90	2.82463	4.93823	5.99353	7.18126	4.3152	7.25575	6.0076	7.37369	5.05199	5.56772
mmu-miR-1943-3p	MIMAT0017342	0.693785	0.163553	-2.02776	3	4	124	277	2	70	46	239	16	34	3.4096	3.7683	4.94773	5.81724	2.73024	5.12765	4.9462	6.48339	5.05199	4.16333
mmu-miR-6953-5p	MIMAT0027806	0.693785	0.1635	-2.31914	7	1	77	207	1	97	18	168	7	54	4.63199	1.7683	4.26032	5.39699	1.73024	5.59828	3.59256	5.97484	3.85934	4.83075
mmu-miR-7221-3p	MIMAT0028411	0.693785	0.163679	-2.40817	2	0	72	174	2	17	26	121	11	30	2.82463	0	4.16345	5.14645	2.73024	3.08583	4.12307	5.50139	4.51142	3.98276
mmu-miR-7681-5p	MIMAT0029882	0.693785	0.163558	-2.05332	1	1	50	112	1	14	15	89	6	27	1.82463	1.7683	3.63738	4.51086	1.73024	2.80572	3.32952	5.05826	3.63695	3.83075
mmu-miR-7658-5p	MIMAT0029822	0.695951	0.165221	-2.14529	2	3	235	340	11	119	54	241	12	191	2.82463	3.35326	5.87005	6.11289	5.18967	5.89318	5.17752	6.49541	4.63695	6.65329
mmu-miR-6948-5p	MIMAT0027796	0.697015	0.167655	-2.17789	0	1	33	63	2	23	9	98	3	14	0	1.7683	3.03792	3.68078	2.73024	3.52193	2.59256	5.19723	2.63695	2.88322
mmu-miR-7057-3p	MIMAT0028019	0.697015	0.167408	-2.3986	1	0	3	59	0	8	13	25	5	0	1.82463	0	0	3.58615	0	1.99837	3.12307	3.22638	3.37391	0
mmu-miR-7024-5p	MIMAT0027952	0.697053	0.168021	-2.13465	0	1	51	41	5	22	22	44	7	13	0	1.7683	3.66595	3.06105	4.05216	3.4578	3.88207	4.04196	3.85934	2.7763
mmu-miR-6405	MIMAT0025157	0.701088	0.169711	-2.46749	1	2	184	299	1	97	29	106	5	100	1.82463	2.7683	5.51709	5.9275	1.73024	5.59828	4.28062	5.31045	3.37391	5.71972
mmu-miR-5625-5p	MIMAT0022379	0.703861	0.170768	-2.07758	4	4	55	205	1	64	20	219	9	41	3.82463	3.7683	3.77489	5.38298	1.73024	4.99837	3.74456	6.35731	4.22191	4.43342
mmu-miR-6942-5p	MIMAT0027784	0.706337	0.173873	-2.06107	0	1	17	5	0	10	6	7	5	0	0	1.7683	2.08099	0.0254307	0	2.3203	2.0076	1.38988	3.37391	0
mmu-miR-6241	MIMAT0024862	0.706632	0.174389	-2.27982	3	1	112	253	14	173	34	278	8	83	3.4096	1.7683	4.80088	5.6865	5.53759	6.433	4.5101	6.70147	4.05199	5.4509
mmu-miR-1947-3p	MIMAT0017343	0.710001	0.181525	-2.30845	5	0	116	88	3	103	23	67	5	55	4.14656	0	4.85151	4.16293	3.3152	5.68487	3.9462	4.64861	3.37391	4.85722
mmu-miR-19b-2-5p	MIMAT0017010	0.710001	0.178586	-2.28958	0	0	20	58	3	14	4	60	5	16	0	0	2.31546	3.56148	3.3152	2.80572	1.42263	4.48942	3.37391	3.07586
mmu-miR-3058-5p	MIMAT0014813	0.710001	0.192399	-2.28744	2	0	50	126	0	27	14	36	4	19	2.82463	0	3.63738	4.68078	0	3.75325	3.22999	3.75245	3.05199	3.32379
mmu-miR-3086-5p	MIMAT0014880	0.710001	0.183564	-2.40799	0	1	51	80	1	65	11	42	1	46	0	1.7683	3.66595	4.02543	1.73024	5.02074	2.88207	3.97484	1.05199	4.59943
mmu-miR-342-5p	MIMAT0004653	0.710001	0.194047	-2.35479	0	2	24	4	2	20	17	3	14	10	0	2.7683	2.57849	0	2.73024	3.3203	3.5101	0.167487	4.85934	2.39779
mmu-miR-344i	MIMAT0022503	0.710001	0.181748	-2.57117	0	0	94	108	2	39	7	90	6	19	0	0	4.54812	4.45839	2.73024	4.28377	2.22999	5.07438	3.63695	3.32379
mmu-miR-3552	MIMAT0035715	0.710001	0.176789	-2.12275	5	4	46	56	0	18	27	51	10	40	4.14656	3.7683	3.51709	3.51086	0	3.16829	4.17752	4.25495	4.37391	4.39779
mmu-miR-367-3p	MIMAT0003181	0.710001	0.188939	-2.17233	2	1	42	89	0	29	12	80	2	29	2.82463	1.7683	3.38585	4.17924	0	3.85635	3.0076	4.90445	2.05199	3.93385
mmu-miR-500-5p	MIMAT0017258	0.710001	0.19466	-2.02728	0	0	13	8	2	8	12	12	4	0	0	0	1.69397	0.703503	2.73024	1.99837	3.0076	2.16749	3.05199	0
mmu-miR-6379	MIMAT0025125	0.710001	0.193776	-2.10585	0	1	64	76	2	54	13	16	6	25	0	1.7683	3.99353	3.95143	2.73024	4.75325	3.12307	2.58252	3.63695	3.71972
mmu-miR-6389	MIMAT0025137	0.710001	0.184734	-2.27091	1	2	77	96	0	52	28	37	2	37	1.82463	2.7683	4.26032	4.28847	0	4.69881	4.22999	3.79198	2.05199	4.28532
mmu-miR-6915-3p	MIMAT0027731	0.710001	0.186654	-2.16939	4	0	93	76	4	54	19	94	7	35	3.82463	0	4.53269	3.95143	3.73024	4.75325	3.67056	5.13711	3.85934	4.20515
mmu-miR-7070-3p	MIMAT0028047	0.710001	0.184798	-2.25742	1	10	226	127	5	29	306	94	18	83	1.82463	5.09023	5.81371	4.69219	4.05216	3.85635	7.68002	5.13711	5.22191	5.4509
mmu-miR-7070-5p	MIMAT0028046	0.710001	0.188351	-2.51922	0	1	131	50	1	21	43	57	1	54	0	1.7683	5.02695	3.34736	1.73024	3.39068	4.8489	4.41542	1.05199	4.83075
mmu-miR-7073-3p	MIMAT0028053	0.710001	0.188538	-2.02485	0	6	22	41	2	23	29	33	5	14	0	4.35326	2.45296	3.06105	2.73024	3.52193	4.28062	3.62692	3.37391	2.88322
mmu-miR-7230-5p	MIMAT0028428	0.710001	0.193708	-2.01678	0	0	25	10	2	5	4	32	2	16	0	0	2.63738	1.02543	2.73024	1.3203	1.42263	3.58252	2.05199	3.07586
mmu-miR-759	MIMAT0003897	0.710001	0.189857	-3.21549	0	12	19	41	26	28	251	14	67	53	0	5.35326	2.24146	3.06105	6.43067	3.80572	7.39418	2.38988	7.11808	4.80379
mmu-miR-7658-3p	MIMAT0029823	0.710001	0.190906	-2.11293	14	35	2310	1774	16	1033	300	1260	59	870	5.63199	6.89758	9.16721	8.49629	5.73024	9.01099	7.65145	8.88173	6.93463	8.84074
mmu-miR-7674-5p	MIMAT0029856	0.710001	0.18734	-2.48816	1	0	185	188	4	46	27	79	7	84	1.82463	0	5.52491	5.25809	3.73024	4.52193	4.17752	4.88631	3.85934	5.46818
mmu-miR-323-3p	MIMAT0000551	0.71236	0.195771	-2.26961	1	0	44	34	0	41	4	30	1	24	1.82463	0	3.45296	2.79097	0	4.35592	1.42263	3.48942	1.05199	3.66083
mmu-miR-471-3p	MIMAT0017195	0.713004	0.196313	-3.11712	15	76	20	29	1	177	204	123	59	11	5.73153	8.01623	2.31546	2.56148	1.73024	6.46597	7.09506	5.52504	6.93463	2.5353
mmu-miR-6969-3p	MIMAT0027841	0.718033	0.199168	-2.404	5	11	82	199	3	25	364	473	4	186	4.14656	5.22773	4.35108	5.34013	3.3152	3.64222	7.93043	7.46822	3.05199	6.61502
mmu-miR-6715-3p	MIMAT0029877	0.72092	0.200337	-2.28341	0	0	17	30	2	14	11	19	14	0	0	0	2.08099	2.61039	2.73024	2.80572	2.88207	2.83045	4.85934	0
mmu-miR-6416-3p	MIMAT0025171	0.721399	0.20084	-2.28146	3	1	129	101	0	31	41	69	3	41	3.4096	1.7683	5.00476	4.36171	0	3.95256	4.78019	4.69105	2.63695	4.43342
mmu-miR-6927-3p	MIMAT0027755	0.725088	0.203735	-2.07991	0	2	45	92	3	20	52	48	3	27	0	2.7683	3.48538	4.22706	3.3152	3.3203	5.12307	4.16749	2.63695	3.83075
mmu-miR-7068-3p	MIMAT0028043	0.725088	0.203371	-2.05406	5	1	51	64	1	113	18	41	2	53	4.14656	1.7683	3.66595	3.7035	1.73024	5.81855	3.59256	3.94008	2.05199	4.80379
mmu-miR-7072-3p	MIMAT0028051	0.725088	0.203135	-2.21298	2	0	79	49	0	17	10	24	11	12	2.82463	0	4.29731	3.31821	0	3.08583	2.74456	3.16749	4.51142	2.66083
mmu-miR-1983	MIMAT0009455	0.72539	0.206901	-2.11911	0	0	17	22	1	47	10	11	2	0	0	0	2.08099	2.16293	1.73024	4.55296	2.74456	2.04196	2.05199	0
mmu-miR-467d-5p	MIMAT0004886	0.72539	0.208946	-2.20099	0	1	15	2	0	2	6	23	0	36	0	1.7683	1.90042	0	0	0	2.0076	3.10609	0	4.24579
mmu-miR-6349	MIMAT0025092	0.72539	0.21113	-2.71851	3	12	220	304	0	175	58	351	4	112	3.4096	5.35326	5.77489	5.95143	0	6.44958	5.28062	7.03785	3.05199	5.88322
mmu-miR-6977-3p	MIMAT0027857	0.72539	0.212345	-2.79887	6	0	346	820	2	155	38	223	16	121	4.4096	0	6.42816	7.38298	2.73024	6.27449	4.67056	6.38342	5.05199	5.99473
mmu-miR-6987-3p	MIMAT0027877	0.72539	0.21088	-2.89136	0	0	44	425	2	13	9	267	11	27	0	0	3.45296	6.43482	2.73024	2.69881	2.59256	6.64322	4.51142	3.83075
mmu-miR-7233-5p	MIMAT0028434	0.72539	0.2099	-2.25307	0	0	48	40	2	25	7	68	1	23	0	0	3.57849	3.02543	2.73024	3.64222	2.22999	4.66999	1.05199	3.59943
mmu_piR_001538/gb/DQ543617/Mus_musculus:18:14136648:14136678:Plus	GenBank:DQ543617	0.72539	0.212131	-2.65932	0	0	143	101	0	45	5	27	3	39	0	0	5.1534	4.36171	0	4.49022	1.74456	3.33741	2.63695	4.36127
mmu-miR-7a-1-3p	MIMAT0004670	0.725647	0.212792	-2.45654	0	1	14	58	2	72	6	81	0	36	0	1.7683	1.80088	3.56148	2.73024	5.16829	2.0076	4.92237	0	4.24579
mmu_piR_000620/gb/DQ540981/Mus_musculus:18:54824345:54824374:Minus	GenBank:DQ540981	0.726711	0.213476	-2.77548	24	215	242	151	30	171	2617	110	847	331	6.4096	9.51649	5.91239	4.94191	6.63713	6.41622	10.7763	5.36388	10.7782	7.44655
mmu-miR-5125	MIMAT0020635	0.731852	0.216701	-2.41944	0	0	24	107	0	17	11	37	6	0	0	0	2.57849	4.44497	0	3.08583	2.88207	3.79198	3.63695	0
mmu-miR-6391	MIMAT0025140	0.731852	0.216926	-2.14691	3	3	120	37	0	24	23	54	3	91	3.4096	3.35326	4.90042	2.91296	0	3.58333	3.9462	4.33741	2.63695	5.58366
mmu-miR-7083-5p	MIMAT0028072	0.731852	0.217392	-2.17847	0	1	66	61	0	52	7	19	3	12	0	1.7683	4.03792	3.63424	0	4.69881	2.22999	2.83045	2.63695	2.66083
mmu-miR-7212-5p	MIMAT0028392	0.731852	0.216954	-2.08968	0	7	96	53	4	71	18	43	12	36	0	4.57566	4.57849	3.43142	3.73024	5.14811	3.59256	4.00879	4.63695	4.24579
mmu-miR-7055-3p	MIMAT0028015	0.732285	0.218111	-2.3777	4	4	323	816	1	243	86	229	8	124	3.82463	3.7683	6.32892	7.37593	1.73024	6.92318	5.8489	6.42173	4.05199	6.03006
mmu-miR-6375	MIMAT0025119	0.736819	0.220457	-2.28647	2	2	199	301	1	153	41	166	3	71	2.82463	2.7683	5.63015	5.93712	1.73024	6.25575	4.78019	5.95756	2.63695	5.22561
mmu_piR_000691/gb/DQ541218/Mus_musculus:8:126462165:126462190:Minus	GenBank:DQ541218	0.738621	0.221889	-2.8222	0	6	9	10	6	43	96	2	20	11	0	4.35326	1.16345	1.02543	4.3152	4.42463	6.0076	0	5.37391	2.5353
mmu_piR_000691/gb/DQ541218/Mus_musculus:8:126455417:126455442:Minus	GenBank:DQ541218	0.739085	0.222406	-2.10128	1	1	25	37	5	99	45	5	7	18	1.82463	1.7683	2.63738	2.91296	4.05216	5.62772	4.91449	0.904453	3.85934	3.24579
mmu-miR-99a-3p	MIMAT0016981	0.739636	0.223329	-2.86151	3	9	50	7	0	590	14	14	7	10	3.4096	4.93823	3.63738	0.510857	0	8.20294	3.22999	2.38988	3.85934	2.39779
mmu-miR-6928-5p	MIMAT0027756	0.741235	0.226657	-2.41503	0	1	62	60	0	107	6	20	1	30	0	1.7683	3.94772	3.61039	0	5.73983	2.0076	2.90445	1.05199	3.98276
mmu-miR-7051-5p	MIMAT0028006	0.741235	0.225186	-2.04237	5	107	391	616	16	114	601	531	132	226	4.14656	8.50977	6.60455	6.97029	5.73024	5.83126	8.65386	7.63509	8.09638	6.89604
mmu-miR-290b-3p	MIMAT0029901	0.741762	0.230509	-2.75724	0	0	125	46	2	303	9	25	1	33	0	0	4.95931	3.22706	2.73024	7.24154	2.59256	3.22638	1.05199	4.12026
mmu-miR-467e-5p	MIMAT0005293	0.743325	0.232708	-2.20836	0	1	59	10	0	3	31	5	6	14	0	1.7683	3.87617	1.02543	0	0.58333	4.37683	0.904453	3.63695	2.88322
mmu-miR-10b-3p	MIMAT0004538	0.74828	0.234747	-2.28215	9	6	174	110	1	27	199	525	4	84	4.99456	4.35326	5.43647	4.48486	1.73024	3.75325	7.05926	7.6187	3.05199	5.46818
mmu-miR-7015-5p	MIMAT0027934	0.750469	0.237354	-2.05608	9	41	297	313	32	882	780	62	103	136	4.99456	7.12585	6.20785	5.99352	6.73024	8.783	9.02996	4.53672	7.73849	6.16333
mmu-miR-1249-5p	MIMAT0014804	0.75067	0.24525	-2.09314	18	18	1649	2653	9	670	197	1561	43	857	5.99456	5.93823	8.6809	9.07691	4.90016	8.38638	7.04469	9.19078	6.47825	8.81902
mmu-miR-412-5p	MIMAT0017173	0.75067	0.242264	-2.06887	6	2	17	143	0	39	17	73	3	34	4.4096	2.7683	2.08099	4.86337	0	4.28377	3.5101	4.77235	2.63695	4.16333
mmu-miR-449c-3p	MIMAT0022715	0.75067	0.247576	-2.27093	0	0	145	93	3	46	13	66	4	19	0	0	5.17344	4.24266	3.3152	4.52193	3.12307	4.62692	3.05199	3.32379
mmu-miR-598-5p	MIMAT0017283	0.75067	0.246683	-2.7763	0	1	68	795	3	50	44	565	3	30	0	1.7683	4.08099	7.33831	3.3152	4.64222	4.88207	7.72463	2.63695	3.98276
mmu-miR-707	MIMAT0003497	0.75067	0.243844	-2.22249	4	0	76	234	1	66	13	115	5	34	3.82463	0	4.24146	5.57387	1.73024	5.04276	3.12307	5.42801	3.37391	4.16333
mmu-miR-7646-5p	MIMAT0029794	0.75067	0.243905	-2.06808	0	1	23	73	2	5	17	125	5	10	0	1.7683	2.51709	3.89333	2.73024	1.3203	3.5101	5.54831	3.37391	2.39779
mmu-miR-6409	MIMAT0025162	0.752812	0.249268	-2.06534	0	4	72	57	0	18	24	20	6	15	0	3.7683	4.16345	3.53639	0	3.16829	4.0076	2.90445	3.63695	2.98276
mmu-miR-1264-5p	MIMAT0014802	0.754297	0.250145	-2.15711	0	0	93	50	2	46	9	8	7	23	0	0	4.53269	3.34736	2.73024	4.52193	2.59256	1.58252	3.85934	3.59943
mmu-miR-6955-3p	MIMAT0027811	0.758344	0.255894	-2.52943	0	9	165	128	0	97	18	128	3	37	0	4.93823	5.35985	4.7035	0	5.59828	3.59256	5.58253	2.63695	4.28532
mmu-miR-7088-3p	MIMAT0028083	0.759817	0.258549	-2.51874	0	10	395	504	1	102	52	153	16	65	0	5.09023	6.61924	6.68078	1.73024	5.67079	5.12307	5.83991	5.05199	5.09823
mmu_piR_001570/gb/DQ543701/Mus_musculus:3:5843412:5843441:Plus	GenBank:DQ543701	0.760546	0.259944	-2.27704	1	8	55	42	0	20	61	6	30	23	1.82463	4.7683	3.77489	3.09582	0	3.3203	5.35337	1.16749	5.95888	3.59943
mmu-miR-302d-5p	MIMAT0017225	0.764538	0.263552	-2.03809	0	0	12	77	0	9	11	32	2	0	0	0	1.57849	3.97029	0	2.16829	2.88207	3.58252	2.05199	0
mmu-miR-449c-5p	MIMAT0003460	0.767365	0.270476	-2.32699	1	0	19	131	0	46	15	85	2	0	1.82463	0	2.24146	4.73693	0	4.52193	3.32952	4.99192	2.05199	0
mmu-miR-6537-3p	MIMAT0025582	0.767365	0.267359	-2.1719	7	2	96	359	0	47	17	127	19	54	4.63199	2.7683	4.57849	6.19134	0	4.55296	3.5101	5.57121	5.29991	4.83075
mmu-miR-7011-3p	MIMAT0027927	0.767365	0.272508	-2.18404	0	1	228	110	10	45	74	43	14	26	0	1.7683	5.82642	4.48486	5.05216	4.49022	5.63209	4.00879	4.85934	3.7763
mmu-miR-8107	MIMAT0031412	0.767365	0.272068	-2.27573	0	3	93	636	6	171	22	129	10	56	0	3.35326	4.53269	7.01639	4.3152	6.41622	3.88207	5.59375	4.37391	4.88322
mmu-miR-666-5p	MIMAT0003737	0.771929	0.277257	-2.21815	0	7	393	103	8	129	27	79	10	185	0	4.57566	6.61191	4.39	4.73024	6.00959	4.17752	4.88631	4.37391	6.60725
mmu-miR-673-3p	MIMAT0004824	0.774701	0.280562	-2.26889	2	0	256	422	2	61	63	120	5	49	2.82463	0	5.99353	6.4246	2.73024	4.9291	5.39991	5.48942	3.37391	4.69057
mmu_piR_000616/gb/DQ540965/Mus_musculus:3:5843413:5843444:Plus	GenBank:DQ540965	0.774743	0.286266	-2.19868	0	9	73	65	1	34	68	7	27	21	0	4.93823	4.18335	3.72587	1.73024	4.08583	5.5101	1.38988	5.80687	3.46818
mmu-miR-1198-5p	MIMAT0005859	0.774975	0.291904	-2.04276	46	151	210	179	110	390	1683	156	378	391	7.3482	9.00671	5.70777	5.18732	8.51159	7.6057	10.1395	5.86793	9.61423	7.68689
mmu-miR-345-5p	MIMAT0000595	0.774975	0.291026	-2.3134	0	2	293	71	0	33	9	13	18	50	0	2.7683	6.18829	3.85325	0	4.04276	2.59256	2.28296	5.22191	4.71972
mmu-miR-8119	MIMAT0031425	0.774975	0.291413	-2.04627	2	0	124	176	7	100	14	128	7	38	2.82463	0	4.94773	5.16293	4.53759	5.64222	3.22999	5.58253	3.85934	4.32379
mmu_piR_000616/gb/DQ540965/Mus_musculus:2:5296571:5296602:Minus	GenBank:DQ540965	0.774975	0.289316	-2.50182	2	21	120	105	0	102	215	8	44	30	2.82463	6.16062	4.90042	4.41775	0	5.67079	7.17083	1.58252	6.51142	3.98276
mmu_piR_000622/gb/DQ540988/Mus_musculus:2:5296560:5296587:Minus	GenBank:DQ540988	0.774975	0.290517	-2.01192	0	1	52	43	8	13	76	13	12	16	0	1.7683	3.69397	3.12977	4.73024	2.69881	5.67056	2.28296	4.63695	3.07586
mmu_piR_000691/gb/DQ541218/Mus_musculus:8:126494409:126494434:Minus	GenBank:DQ541218	0.774975	0.291727	-2.1434	4	17	56	56	11	287	276	9	49	45	3.82463	5.85576	3.80088	3.51086	5.18967	7.16327	7.53116	1.75245	6.6667	4.56772
mmu-miR-1912-3p	MIMAT0014958	0.775201	0.294913	-2.49858	1	1	28	246	0	12	56	280	0	33	1.82463	1.7683	2.80088	5.64602	0	2.58333	5.22999	6.71181	0	4.12026
mmu_piR_000691/gb/DQ541218/Mus_musculus:8:126485950:126485975:Minus	GenBank:DQ541218	0.775682	0.30018	-2.37828	0	7	22	20	8	89	97	1	17	20	0	4.57566	2.45296	2.02543	4.73024	5.4741	6.02255	0	5.13945	3.39779
mmu-miR-5114	MIMAT0020622	0.777477	0.302508	-2.19045	4	0	264	452	4	86	157	51	8	76	3.82463	0	6.03792	6.52368	3.73024	5.42463	6.71725	4.25495	4.05199	5.32379
mmu_piR_000691/gb/DQ541218/Mus_musculus:8:126472331:126472356:Minus	GenBank:DQ541218	0.781621	0.315843	-2.22053	0	5	27	20	8	82	46	2	22	22	0	4.09023	2.74842	2.02543	4.73024	5.35592	4.9462	0	5.51142	3.5353
mmu-miR-140-3p	MIMAT0000152	0.796167	0.332891	-2.12744	85	84	310	67	51	502	1131	61	528	267	8.23403	8.16062	6.26965	3.76959	7.40266	7.96991	9.56602	4.51326	10.0964	7.13656
mmu-miR-10a-5p	MIMAT0000648	0.798043	0.347153	-2.23731	141	108	522	40	40	669	1253	63	578	346	8.96419	8.52319	7.02144	3.02543	7.05216	8.38423	9.71381	4.5598	10.2269	7.51049
mmu-miR-7240-3p	MIMAT0028449	0.802517	0.353617	-2.04014	0	0	66	143	2	60	2	39	5	35	0	0	4.03792	4.86337	2.73024	4.90526	0.422635	3.86793	3.37391	4.20515
mmu-miR-5625-3p	MIMAT0022380	0.821075	0.376982	-2.03118	1	4	88	388	0	92	22	248	2	21	1.82463	3.7683	4.45296	6.30342	0	5.52193	3.88207	6.53672	2.05199	3.46818
mmu-miR-704	MIMAT0003494	0.866448	0.493583	-2.16089	0	1	3057	80	47	69	12	58	120	393	0	1.7683	9.57143	4.02543	7.28482	5.10689	3.0076	4.44051	7.95888	7.69425

## Sheet: Supplementary Table S3.
Supplementary Table S3. The list of pathways related to the salivary miRNAs changed in the sCSDS mice.
Pathway	Genes found in pathways [n]	Genes meeting criterion [r]	Criterion for Z score [z]	Permuted P-Value [p]
Oxidative phosphorylation	48	3	2.7	0.008
ApoE and miR-146 in inflammation and atherosclerosis	8	1	2.55	0.014
Small Ligand GPCRs	18	2	3.34	0.016
BMP Signaling Pathway in Eyelid Development	20	2	3.12	0.021
Pentose Phosphate Pathway	7	1	2.77	0.023
EDA Signalling in Hair Follicle Development	14	1	1.73	0.024
Robo4 and VEGF Signaling Pathways Crosstalk	6	1	3.04	0.033
Monoamine GPCRs	33	2	2.15	0.033
Electron Transport Chain	82	3	1.61	0.04
Estrogen metabolism	13	1	1.83	0.052
Glucuronidation	17	1	1.48	0.054
Calcium Regulation in the Cardiac Cell	144	0	-1.51	0.077
Glutathione metabolism	19	1	1.34	0.079
Delta-Notch Signaling Pathway	82	0	-1.13	0.08
Splicing factor NOVA regulated synaptic proteins	42	2	1.73	0.086
Apoptosis	80	0	-1.12	0.095
IL-7 Signaling Pathway	44	2	1.66	0.099
Striated Muscle Contraction	45	0	-0.83	0.107
Selenium metabolism/Selenoproteins	46	2	1.58	0.111
Eukaryotic Transcription Initiation	40	0	-0.79	0.113
Notch Signaling Pathway	46	0	-0.84	0.114
G Protein Signaling Pathways	90	0	-1.18	0.115
Macrophage markers	10	0	-0.39	0.116
Wnt Signaling Pathway and Pluripotency	97	0	-1.23	0.116
Mitochondrial Gene Expression	19	1	1.34	0.119
Oxidative Damage	41	0	-0.8	0.127
Microglia Pathogen Phagocytosis Pathway	41	0	-0.8	0.158
FAS pathway and Stress induction of HSP regulation	37	0	-0.76	0.166
GPCRs, Class C Metabotropic glutamate, pheromone	15	0	-0.48	0.168
Complement and Coagulation Cascades	61	0	-0.97	0.17
TYROBP Causal Network	58	0	-0.95	0.171
G1 to S cell cycle control	62	0	-0.98	0.175
Wnt Signaling Pathway	60	0	-0.96	0.178
Alpha6-Beta4 Integrin Signaling Pathway	66	0	-1.01	0.188
Alzheimers Disease	75	0	-1.08	0.19
Homologous recombination	13	0	-0.45	0.195
Kit Receptor Signaling Pathway	67	0	-1.02	0.198
Wnt Signaling in Kidney Disease	37	0	-0.76	0.199
G13 Signaling Pathway	37	0	-0.76	0.202
Endochondral Ossification	62	2	1.11	0.203
PluriNetWork	288	7	1.31	0.205
Primary Focal Segmental Glomerulosclerosis FSGS	69	0	-1.04	0.213
Gene regulatory network modelling somitogenesis	11	0	-0.41	0.221
Mismatch repair	9	0	-0.37	0.224
Chemokine signaling pathway	174	1	-1.03	0.225
MAPK Cascade	28	1	0.9	0.226
NLR Proteins	9	0	-0.37	0.23
Signal Transduction of S1P Receptor	22	1	1.17	0.232
EBV LMP1 signaling	22	1	1.17	0.233
Hedgehog Signaling Pathway	22	1	1.17	0.238
Blood Clotting Cascade	20	0	-0.55	0.238
Hypertrophy Model	20	0	-0.55	0.241
GPCRs, Class B Secretin-like	22	0	-0.58	0.248
Nuclear Receptors	38	0	-0.77	0.248
MAPK signaling pathway	158	1	-0.92	0.249
Hfe effect on hepcidin production	7	0	-0.33	0.253
IL-9 Signaling Pathway	24	0	-0.61	0.253
Metapathway biotransformation	143	4	1.28	0.256
Focal Adhesion	184	1	-1.09	0.263
Regulation of Actin Cytoskeleton	151	1	-0.87	0.274
Insulin Signaling	159	4	1.05	0.279
Apoptosis Modulation by HSP70	17	0	-0.51	0.28
Orphan GPCRs	19	0	-0.54	0.284
EGFR1 Signaling Pathway	173	4	0.88	0.289
EPO Receptor Signaling	26	0	-0.63	0.293
Inflammatory Response Pathway	30	1	0.82	0.295
Fatty Acid Omega Oxidation	7	0	-0.33	0.295
Iron Homeostasis	14	0	-0.46	0.306
Matrix Metalloproteinases	29	0	-0.67	0.307
White fat cell differentiation	32	1	0.75	0.312
Oxidative Stress	29	1	0.86	0.314
Histone modifications	5	0	-0.28	0.319
Dopaminergic Neurogenesis	30	1	0.82	0.32
Ovarian Infertility Genes	31	0	-0.69	0.328
Factors and pathways affecting insulin-like growth factor (IGF1)-Akt signaling	32	1	0.75	0.34
Toll Like Receptor signaling	33	1	0.72	0.34
Signaling of Hepatocyte Growth Factor Receptor	34	0	-0.72	0.342
GPCRs, Class A Rhodopsin-like	226	5	0.88	0.351
Type II interferon signaling (IFNG)	33	0	-0.71	0.351
p38 MAPK Signaling Pathway	33	1	0.72	0.353
Novel Jun-Dmp1 Pathway	26	0	-0.63	0.365
MicroRNAs in Cardiomyocyte Hypertrophy	82	0	-1.13	0.378
Triacylglyceride Synthesis	23	0	-0.6	0.381
Cytokines and Inflammatory Response	28	0	-0.66	0.39
Leptin Insulin Overlap	18	0	-0.53	0.406
Folic Acid Network	24	1	1.07	0.408
ESC Pluripotency Pathways	117	1	-0.59	0.425
Adipogenesis genes	132	3	0.73	0.426
Complement Activation, Classical Pathway	16	0	-0.5	0.434
Mitochondrial LC-Fatty Acid Beta-Oxidation	16	0	-0.5	0.435
Selenium Micronutrient Network	26	1	0.98	0.441
miR-127 in mesendoderm differentiation	9	0	-0.37	0.444
Glycogen Metabolism	34	0	-0.72	0.448
Hypothetical Network for Drug Addiction	31	0	-0.69	0.449
Fatty Acid Biosynthesis	22	0	-0.58	0.463
Keap1-Nrf2	14	0	-0.46	0.483
Serotonin and anxiety-related events	13	0	-0.45	0.5
mRNA processing	439	5	-0.67	0.543
Odorant GPCRs	188	2	-0.51	0.561
PPAR signaling pathway	81	2	0.71	0.563
SREBF and miR33 in cholesterol and lipid homeostasis	11	0	-0.41	0.572
Non-odorant GPCRs	266	5	0.51	0.579
GPCRs, Other	158	3	0.41	0.592
Nucleotide GPCRs	11	0	-0.41	0.604
Fatty Acid Beta Oxidation	34	0	-0.72	0.616
Cytoplasmic Ribosomal Proteins	72	2	0.89	0.621
Integrin-mediated Cell Adhesion	98	1	-0.4	0.63
Amino Acid metabolism	94	1	-0.36	0.632
Glycolysis and Gluconeogenesis	48	0	-0.86	0.632
IL-3 Signaling Pathway	99	1	-0.41	0.633
Neural Crest Differentiation	101	2	0.39	0.634
Tryptophan metabolism	44	1	0.42	0.636
IL-6 signaling Pathway	99	1	-0.41	0.638
Parkinsons Disease Pathway	37	0	-0.76	0.638
Glutathione and one carbon metabolism	31	1	0.78	0.644
IL-2 Signaling Pathway	76	1	-0.14	0.645
Osteoclast	14	0	-0.46	0.66
Spinal Cord Injury	98	1	-0.4	0.665
One Carbon Metabolism	29	0	-0.67	0.674
Estrogen signaling	73	1	-0.1	0.682
TNF-alpha NF-kB Signaling Pathway	179	2	-0.44	0.693
miR-222 in Exercise-Induced Cardiac Growth	4	0	-0.25	0.694
TCA Cycle	31	0	-0.69	0.695
Lung fibrosis	61	1	0.08	0.7
Prostaglandin Synthesis and Regulation	31	0	-0.69	0.715
Myometrial Relaxation and Contraction Pathways	149	3	0.51	0.739
Ptf1a related regulatory pathway	11	0	-0.41	0.756
Purine metabolism	163	2	-0.3	0.774
Retinol metabolism	39	1	0.54	0.775
Regulation of Cardiac Hypertrophy by miR-208	6	0	-0.3	0.778
Focal Adhesion-PI3K-Akt-mTOR-signaling pathway	319	4	-0.39	0.786
Osteoblast	10	0	-0.39	0.79
Leptin and adiponectin	10	0	-0.39	0.793
Non-homologous end joining	6	0	-0.3	0.799
Oxidation by Cytochrome P450	40	1	0.51	0.8
One carbon metabolism and related pathways	55	1	0.19	0.808
Nuclear receptors in lipid metabolism and toxicity	30	0	-0.68	0.833
Wnt Signaling Pathway NetPath	108	2	0.29	0.882
Serotonin and anxiety	17	0	-0.51	0.883
DNA Replication	41	1	0.49	0.915
miR-1 in cardiac development	3	0	-0.21	0.922
Dysregulated miRNA Targeting in Insulin/PI3K-AKT Signaling	26	0	-0.63	0.925
Methylation	9	0	-0.37	0.959
Irinotecan Pathway	11	0	-0.41	0.965
Statin Pathway	19	0	-0.54	0.976
Peptide GPCRs	70	1	-0.06	0.978
Heart Development	44	1	0.42	0.983
Aflatoxin B1 metabolism	5	0	-0.28	0.992
SIDS Susceptibility Pathways	60	1	0.1	0.993
IL-5 Signaling Pathway	69	1	-0.04	0.993
Synthesis and Degradation of Ketone Bodies	5	0	-0.28	0.994
ACE Inhibitor Pathway	7	0	-0.33	0.994
Proteasome Degradation	52	1	0.24	0.996
IL-1 Signaling Pathway	39	1	0.54	0.998
TGF Beta Signaling Pathway	52	1	0.24	0.998
Polyol pathway	4	0	-0.25	0.998
ErbB signaling pathway	46	1	0.37	0.999
Exercise-induced Circadian Regulation	49	1	0.31	0.999
Translation Factors	49	1	0.31	0.999
Id Signaling Pathway	51	1	0.26	0.999
miRNA regulation of DNA Damage Response	65	1	0.02	0.999
Amino acid conjugation of benzoic acid	2	0	-0.18	0.999
Arachidonate Epoxygenase Epoxide Hydrolase	3	0	-0.21	0.999
Acetylcholine Synthesis	7	0	-0.33	0.999
Heme Biosynthesis	9	0	-0.37	0.999
Fatty acid oxidation	10	0	-0.39	0.999
Alanine and aspartate metabolism	12	0	-0.43	0.999
Glucocorticoid & Mineralcorticoid Metabolism	13	0	-0.45	0.999
Steroid Biosynthesis	13	0	-0.45	0.999
Kennedy pathway	14	0	-0.46	0.999
Cholesterol Biosynthesis	15	0	-0.48	0.999
Biogenic Amine Synthesis	15	0	-0.48	0.999
Eicosanoid Synthesis	18	0	-0.53	0.999
Nucleotide Metabolism	19	0	-0.54	0.999

## Sheet: Supplementary Table S4.
Supplementary Table S4. The list of salivary metabolites up/downregulated by sCSDS measured by the CE-FTMS analysis (p value < 0.05).
CE-FTMS
Metabolites	Fold change	p value	q value
Arg-Glu	0.5	0.013	0.998
Dihydroxyacetone phosphate	0.7	0.013	0.998
Lactic acid	0.7	0.04	0.998
2-Hydroxy-4-methylvaleric acid	2.1	0.043	0.998
Anserine divalent	0.8	0.048	0.998

## Sheet: Supplementary Table S5.
Supplementary Table S5. The list of salivary metabolites up/downregulated by sCSDS measured by the LC-TOFMS analysis (p value < 0.05).
LC-TOFMS
Metabolites	Fold change	p value	q value
Cortexolone + Corticosterone + 21-Deoxycortisol	2.4	0.005	0.211
Palmitoylethanolamide	0.7	0.024	0.457
cis-11-Eicosenoic acid	0.7	0.034	0.457
α-Tocopherol acetate	0.6	0.04	0.457
